# Supplementary material for: Computational study on alkenyl/aryl C(sp2)–O homolytic cleavage of carboxylates and carbamates
Source: Royal Society of Chemistry journal article supplement (doi:10.1039/c5ra27859g), 2016-01-01

## Supporting Information

### Computational study on alkenyl/aryl C(sp<sup>2</sup>)-O homolytic cleavage of carboxylates and carbamates

Wenrui Zheng\*, Lanlan Ding, Jiaoyang Wang and Yingxing Wang

College of Chemistry and Chemical Engineering, Shanghai University of Engineering Science, Shanghai 201620, China

Table 1. The 19 C-O calculated BDEs using 14 DFTs (kJ/mol)

| entry | compounds                                                                            | B3LYP | X3LYP | M06   | M06-2X | M06-L | t-HTCH |
|-------|--------------------------------------------------------------------------------------|-------|-------|-------|--------|-------|--------|
| 1     | $\text{H}_3\text{C}-\overset{\text{O}}{\parallel}{\text{C}}-\text{OH}$               | 345.7 | 350.7 | 382.9 | 407.9  | 344.2 | 335.3  |
| 2     | $\text{HC}(\text{O})-\text{OH}$                                                      | 436.8 | 439.1 | 469.3 | 464.2  | 451.9 | 457.7  |
| 3     | $\text{CH}_3-\overset{\text{O}}{\parallel}{\text{C}}-\text{OH}$                      | 432.3 | 435.1 | 469.3 | 464.6  | 449.7 | 449.2  |
| 4     | $\text{C}_2\text{H}_5-\overset{\text{O}}{\parallel}{\text{C}}-\text{OH}$             | 417.5 | 421.0 | 441.4 | 452.1  | 419.5 | 423.5  |
| 5     | $\text{C}_2\text{H}_5-\overset{\text{O}}{\parallel}{\text{C}}-\text{OH}$             | 433.5 | 436.5 | 473.5 | 467.5  | 453.8 | 449.7  |
| 6     | $\text{HO}-\text{CH}(\text{O})\text{OH}$                                             | 332.2 | 334.7 | 361.5 | 364.6  | 341.9 | 344.1  |
| 7     | $\text{CH}_3-\overset{\text{O}}{\parallel}{\text{C}}-\text{CH}_3$                    | 328.0 | 333.0 | 367.5 | 392.5  | 328.2 | 317.1  |
| 8     | $\text{HC}(\text{O})-\text{OCH}_3$                                                   | 384.6 | 387.7 | 420.6 | 423.8  | 400.7 | 395.3  |
| 9     | $\text{CH}_3-\overset{\text{O}}{\parallel}{\text{C}}-\text{OCH}_3$                   | 377.8 | 381.4 | 418.5 | 422.2  | 396.3 | 384.4  |
| 10    | $\text{C}_2\text{H}_5-\overset{\text{O}}{\parallel}{\text{C}}-\text{OCH}_3$          | 361.4 | 365.7 | 388.7 | 413.4  | 364.5 | 356.7  |
| 11    | $\text{C}_2\text{H}_5-\text{OC}(\text{O})\text{CH}_3$                                | 328.6 | 384.8 | 369.0 | 382.8  | 326.9 | 311.6  |
| 12    | $i\text{C}_3\text{H}_7-\text{OC}(\text{O})\text{CH}_3$                               | 324.8 | 293.6 | 368.9 | 399.3  | 324.0 | 323.1  |
| 13    | 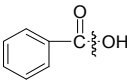  | 430.6 | 433.8 | 470.3 | 446.1  | 450.1 | 445.7  |
| 14    | $\text{H}_3\text{C}-\text{OC}(\text{O})\text{C}_6\text{H}_5$                         | 327.8 | 333.0 | 367.3 | 393.2  | 328.8 | 317.0  |
| 15    | $\text{HC}(\text{O})-\text{OC}_6\text{H}_5$                                          | 280.6 | 284.5 | 312.5 | 329.4  | 298.0 | 287.0  |
| 16    | $\text{C}_4\text{H}_9-\text{OC}(\text{O})\text{CH}_3$                                | 329.3 | 335.4 | 372.2 | 398.6  | 321.7 | 312.2  |
| 17    | $\text{H}_3\text{C}-\overset{\text{O}}{\parallel}{\text{C}}-\text{OC}_6\text{H}_5$   | 279.6 | 284.2 | 317.0 | 335.6  | 300.5 | 280.4  |
| 18    | $\text{C}_6\text{H}_5-\overset{\text{O}}{\parallel}{\text{C}}-\text{OCH}_3$          | 375.8 | 379.9 | 419.4 | 423.8  | 396.7 | 380.6  |
| 19    | $\text{C}_6\text{H}_5-\overset{\text{O}}{\parallel}{\text{C}}-\text{OC}_6\text{H}_5$ | 280.5 | 285.4 | 320.0 | 339.6  | 303.5 | 279.6  |

\* Corresponding author. Tel.: +86 21 67791216; fax: +86 21 67791220.  
E-mail address: wrzheng@sues.edu.cn (W.R. Zheng).

| entry | compounds                                                                                              | wB97  | wB97X | wB97X-D | MPWKCIS1K |
|-------|--------------------------------------------------------------------------------------------------------|-------|-------|---------|-----------|
| 1     | $\text{H}_3\text{C}-\overset{\text{O}}{\parallel}{\text{C}}-\text{OH}$                                 | 392.0 | 385.8 | 376.1   | 373.7     |
| 2     | $\text{HC}(\text{O})-\text{OH}$                                                                        | 457.9 | 457.6 | 455.9   | 446.0     |
| 3     | $\text{CH}_3-\overset{\text{O}}{\parallel}{\text{C}}-\text{OH}$                                        | 457.7 | 456.5 | 454.4   | 443.4     |
| 4     | $\text{C}_2\text{H}_5-\overset{\text{O}}{\parallel}{\text{C}}-\text{OH}$                               | 445.8 | 444.3 | 440.0   | 422.9     |
| 5     | $\text{C}_2\text{H}_5-\overset{\text{O}}{\parallel}{\text{C}}-\text{OH}$                               | 460.8 | 459.1 | 456.9   | 445.2     |
| 6     | $\text{HO}-\text{CH}_2-\text{CH}(\text{O})\text{OH}$                                                   | 357.4 | 354.7 | 353.1   | 336.4     |
| 7     | $\text{CH}_3-\overset{\text{O}}{\parallel}{\text{C}}-\text{O}-\text{CH}_3$                             | 376.4 | 369.6 | 359.9   | 355.9     |
| 8     | $\text{HC}(\text{O})-\text{O}-\text{CH}_3$                                                             | 412.5 | 410.3 | 407.3   | 396.9     |
| 9     | $\text{CH}_3-\overset{\text{O}}{\parallel}{\text{C}}-\text{O}-\text{CH}_3$                             | 410.3 | 407.0 | 404.0   | 392.1     |
| 10    | $\text{C}_2\text{H}_5-\overset{\text{O}}{\parallel}{\text{C}}-\text{O}-\text{CH}_3$                    | 396.7 | 393.2 | 388.1   | 370.3     |
| 11    | $\text{C}_2\text{H}_5-\overset{\text{O}}{\parallel}{\text{C}}-\text{O}-\text{C}(\text{O})\text{CH}_3$  | 379.8 | 372.0 | 360.0   | 357.8     |
| 12    | $i\text{C}_3\text{H}_7-\overset{\text{O}}{\parallel}{\text{C}}-\text{O}-\text{C}(\text{O})\text{CH}_3$ | 381.0 | 372.0 | 363.8   | 370.3     |
| 13    | 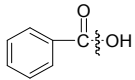                    | 459.2 | 457.3 | 454.7   | 442.6     |
| 14    | $\text{H}_3\text{C}-\overset{\text{O}}{\parallel}{\text{C}}-\text{O}-\text{C}_6\text{H}_5$             | 377.7 | 370.8 | 375.0   | 356.4     |
| 15    | $\text{HC}(\text{O})-\text{O}-\text{C}_6\text{H}_5$                                                    | 305.9 | 306.7 | 307.0   | 302.0     |
| 16    | $\text{C}_4\text{H}_9-\overset{\text{O}}{\parallel}{\text{C}}-\text{O}-\text{C}(\text{O})\text{CH}_3$  | 382.4 | 374.4 | 423.2   | 359.9     |
| 17    | $\text{H}_3\text{C}-\overset{\text{O}}{\parallel}{\text{C}}-\text{O}-\text{C}_6\text{H}_5$             | 310.9 | 310.6 | 310.5   | 302.7     |
| 18    | $\text{C}_6\text{H}_5-\overset{\text{O}}{\parallel}{\text{C}}-\text{O}-\text{CH}_3$                    | 412.0 | 408.1 | 392.6   | 391.3     |
| 19    | $\text{C}_6\text{H}_5-\overset{\text{O}}{\parallel}{\text{C}}-\text{O}-\text{C}_6\text{H}_5$           | 314.7 | 313.7 | 314.1   | 304.5     |

| entry | compounds                                                                                              | MPWB1K | MPW1KCIS | MPW1K | B98   | (wB97) |
|-------|--------------------------------------------------------------------------------------------------------|--------|----------|-------|-------|--------|
| 1     | $\text{H}_3\text{C}-\overset{\text{O}}{\parallel}{\text{C}}-\text{OH}$                                 | 392.1  | 349.1    | 440.6 | 360.6 | 384.3  |
| 2     | $\text{HC}(\text{O})-\text{OH}$                                                                        | 456.3  | 455.3    | 441.6 | 450.5 | 458.0  |
| 3     | $\text{CH}_3-\overset{\text{O}}{\parallel}{\text{C}}-\text{OH}$                                        | 454.4  | 450.0    | 439.4 | 445.8 | 457.6  |
| 4     | $\text{C}_2\text{H}_5-\overset{\text{O}}{\parallel}{\text{C}}-\text{OH}$                               | 439.2  | 427.3    | 420.7 | 431.4 | 445.4  |
| 5     | $\text{C}_2\text{H}_5-\overset{\text{O}}{\parallel}{\text{C}}-\text{OH}$                               | 457.0  | 451.1    | 441.5 | 447.2 | 460.5  |
| 6     | $\text{HO}-\text{CH}_2-\text{CH}(\text{O})\text{OH}$                                                   | 353.0  | 315.3    | 330.4 | 347.1 | 356.6  |
| 7     | $\text{CH}_3-\overset{\text{O}}{\parallel}{\text{C}}-\text{O}-\text{CH}_3$                             | 375.3  | 331.0    | 357.4 | 343.3 | 372.0  |
| 8     | $\text{HC}(\text{O})-\text{O}-\text{CH}_3$                                                             | 409.1  | 423.8    | 395.8 | 397.2 | 413.9  |
| 9     | $\text{CH}_3-\overset{\text{O}}{\parallel}{\text{C}}-\text{O}-\text{CH}_3$                             | 405.4  | 389.5    | 391.6 | 390.4 | 411.5  |
| 10    | $\text{C}_2\text{H}_5-\overset{\text{O}}{\parallel}{\text{C}}-\text{O}-\text{CH}_3$                    | 389.2  | 365.2    | 371.3 | 374.4 | 397.7  |
| 11    | $\text{C}_2\text{H}_5-\overset{\text{O}}{\parallel}{\text{C}}-\text{O}-\text{C}(\text{O})\text{CH}_3$  | 377.4  | 330.0    | 360.3 | 342.9 | 373.0  |
| 12    | $i\text{C}_3\text{H}_7-\overset{\text{O}}{\parallel}{\text{C}}-\text{O}-\text{C}(\text{O})\text{CH}_3$ | 376.0  | 324.7    | 358.3 | 338.8 | 373.0  |
| 13    |                     | 456.0  | 448.0    | 439.2 | 444.6 | 454.6  |
| 14    | $\text{H}_3\text{C}-\overset{\text{O}}{\parallel}{\text{C}}-\text{O}-\text{C}_6\text{H}_5$             | 376.7  | 331.5    | 357.9 | 343.4 | 373.8  |
| 15    | $\text{HC}(\text{O})-\text{O}-\text{C}_6\text{H}_5$                                                    | 314.5  | 294.9    | 301.1 | 293.0 | 304.9  |
| 16    | $\text{C}_4\text{H}_9-\overset{\text{O}}{\parallel}{\text{C}}-\text{O}-\text{C}(\text{O})\text{CH}_3$  | 379.5  | 331.4    | 362.4 | 344.0 | 346.6  |
| 17    | $\text{H}_3\text{C}-\overset{\text{O}}{\parallel}{\text{C}}-\text{O}-\text{C}_6\text{H}_5$             | 317.4  | 290.2    | 362.8 | 291.7 | 309.7  |
| 18    | $\text{C}_6\text{H}_5-\overset{\text{O}}{\parallel}{\text{C}}-\text{O}-\text{CH}_3$                    | 407.1  | 384.7    | 391.4 | 389.1 | 435.2  |
| 19    | $\text{C}_6\text{H}_5-\overset{\text{O}}{\parallel}{\text{C}}-\text{O}-\text{C}_6\text{H}_5$           | 321.9  | 292.7    | 305.2 | 293.0 | 333.0  |

Note: The values of (wB97) are calculated at wB97/6-311++G(2df,2p)//wB97/6-31+G(d) level.

Table 2. The Cartesian coordinates of optimized geometries

|                                                                                                                    |                                                                                                                    |
|--------------------------------------------------------------------------------------------------------------------|--------------------------------------------------------------------------------------------------------------------|
| 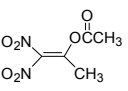 <p>SCF energy=-754.9123076</p>   |  <p>SCF energy=-849.6078855</p>   |
| C 0.25716900 0.76427100 -0.38349500                                                                                | C 0.41647200 0.77404000 -0.30252300                                                                                |
| C -0.84924000 0.03403700 -0.11678000                                                                               | C 1.50176400 0.00920600 -0.03679200                                                                                |
| O 1.35448600 0.05434000 -0.77252900                                                                                | O -0.74031000 0.05322300 -0.35984900                                                                               |
| C 2.54461500 -0.04067300 -0.00632200                                                                               | C -1.91231700 0.56582700 0.23406700                                                                                |
| O 3.53106600 -0.39190900 -0.58068200                                                                               | O -1.88458800 1.52853800 0.97338100                                                                                |
| C 2.39833000 0.24027700 1.46462100                                                                                 | C 0.39465700 2.23267500 -0.63482200                                                                                |
| H 3.36853700 0.09960300 1.94235900                                                                                 | N 1.33297400 -1.43898300 0.22694600                                                                                |
| H 2.05195700 1.26377200 1.64502400                                                                                 | O 1.18693800 -1.77326300 1.39643900                                                                                |
| H 1.66512500 -0.44817400 1.89869100                                                                                | O 1.33136000 -2.18084700 -0.74922100                                                                               |
| C 0.36984600 2.25877600 -0.42694700                                                                                | N 2.87440400 0.43744000 -0.00017900                                                                                |
| H -0.11271300 2.73581200 0.42877000                                                                                | O 3.10834300 1.64208300 -0.13622500                                                                                |
| H 1.42445100 2.54082900 -0.47897900                                                                                | O 3.72254800 -0.43770700 0.17548300                                                                                |
| H -0.13186300 2.63951200 -1.32434500                                                                               | N -2.98501800 -0.17100800 -0.12655100                                                                              |
| N -0.80050400 -1.44317800 -0.13999000                                                                              | C -2.94282600 -1.36090000 -0.97650100                                                                              |
| O -1.39353600 -1.99350200 -1.05618600                                                                              | H -3.11016600 -2.26356600 -0.37516100                                                                              |
| O -0.15999800 -1.99302300 0.75261800                                                                               | H -3.73610300 -1.28886900 -1.72892100                                                                              |
| N -2.15554100 0.56457800 0.20646700                                                                                | H -1.98219300 -1.44352900 -1.47939500                                                                              |
| O -2.34322800 1.76922500 0.01493300                                                                                | C -4.27300700 0.13261500 0.49397300                                                                                |
| O -2.97597800 -0.22279100 0.67143000                                                                               | H -5.02788300 0.29338600 -0.28420000                                                                               |
|  <p>SCF energy=-572.5154923</p> | H -4.59218000 -0.70403000 1.12814400                                                                               |
| C 0.04940800 0.98132800 -0.26031300                                                                                | H -4.17929900 1.03151100 1.10177500                                                                                |
| C -1.00166600 0.12308600 -0.17473000                                                                               | H -0.55016000 2.48454400 -1.11914700                                                                               |
| O 1.27254700 0.52664800 -0.71488200                                                                                | H 1.23432200 2.48666000 -1.28417900                                                                                |
| C 2.16738000 -0.25215800 0.02530000                                                                                | H 0.48435900 2.83476200 0.27511100                                                                                 |
| O 3.15212900 -0.64163400 -0.53763800                                                                               |  <p>SCF energy=-667.2192981</p> |
| C 1.82212500 -0.51776600 1.47126800                                                                                | C 0.96625700 1.00465200 -0.14080600                                                                                |
|                                                                                                                    | C 1.67092500 -0.17119100 -0.09593600                                                                               |

|                                                                                    |                           |             |             |                                                                                     |                          |             |             |
|------------------------------------------------------------------------------------|---------------------------|-------------|-------------|-------------------------------------------------------------------------------------|--------------------------|-------------|-------------|
| H                                                                                  | 2.72401200                | -0.87548300 | 1.96994300  | O                                                                                   | -0.37961900              | 1.05128200  | -0.29496400 |
| H                                                                                  | 1.44678900                | 0.37770900  | 1.97613200  | C                                                                                   | -1.23328900              | 0.31269000  | 0.56333600  |
| H                                                                                  | 1.05052100                | -1.29164900 | 1.54627300  | O                                                                                   | -0.89634400              | 0.04633700  | 1.69654600  |
| C                                                                                  | 0.07603700                | 2.46096400  | -0.03061200 | C                                                                                   | 1.52532600               | 2.39533700  | -0.10994600 |
| H                                                                                  | -0.88937700               | 2.87343400  | 0.26266600  | C                                                                                   | 3.12582900               | -0.16752000 | 0.16137500  |
| H                                                                                  | 0.82130200                | 2.71301600  | 0.73413300  | O                                                                                   | 3.82929100               | -1.16533600 | 0.11523400  |
| H                                                                                  | 0.39728000                | 2.95051900  | -0.95871600 | H                                                                                   | 3.58273000               | 0.80231900  | 0.43318100  |
| C                                                                                  | -2.33954700               | 0.58202700  | 0.28660400  | C                                                                                   | 1.06979200               | -1.50126300 | -0.34755900 |
| O                                                                                  | -3.36382300               | -0.05796700 | 0.16242900  | O                                                                                   | -0.09782600              | -1.71255400 | -0.64695000 |
| H                                                                                  | -2.36962500               | 1.58109100  | 0.76415400  | H                                                                                   | 1.78906600               | -2.33357300 | -0.27885800 |
| C                                                                                  | -0.82605700               | -1.30548500 | -0.58657000 | N                                                                                   | -2.44144300              | 0.12280500  | -0.01132000 |
| O                                                                                  | -1.40516600               | -2.23775200 | -0.06784900 | C                                                                                   | -2.65170400              | 0.19940600  | -1.45577100 |
| H                                                                                  | -0.11248100               | -1.47498300 | -1.41674700 | H                                                                                   | -2.37861300              | -0.74727800 | -1.93954800 |
| 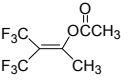 | SCF energy= -1020.0852468 |             |             | H                                                                                   | -3.70994400              | 0.40851700  | -1.63869600 |
| C                                                                                  | 0.53666600                | 0.81683000  | -0.40625100 | H                                                                                   | -2.05561900              | 1.00329300  | -1.88541400 |
| C                                                                                  | -0.56726900               | 0.09013000  | -0.12157500 | C                                                                                   | -3.42012900              | -0.65491900 | 0.74621400  |
| O                                                                                  | 1.67230900                | 0.11508000  | -0.73777800 | H                                                                                   | -4.42364000              | -0.28163600 | 0.51907800  |
| C                                                                                  | 2.85229000                | 0.14199000  | 0.01576600  | H                                                                                   | -3.36299300              | -1.71901100 | 0.47975100  |
| O                                                                                  | 3.85669800                | -0.23613400 | -0.51813200 | H                                                                                   | -3.22263700              | -0.54616000 | 1.81223500  |
| C                                                                                  | 2.72348800                | 0.57833200  | 1.45361700  | H                                                                                   | 1.06795700               | 2.97306500  | -0.92164100 |
| H                                                                                  | 3.70738100                | 0.52198800  | 1.92072000  | H                                                                                   | 1.23312900               | 2.87974500  | 0.83102500  |
| H                                                                                  | 2.34505100                | 1.60265600  | 1.53281900  | H                                                                                   | 2.60861000               | 2.44010600  | -0.21623600 |
| H                                                                                  | 2.02569100                | -0.07834100 | 1.98331300  |  | SCF energy=-1114.7813743 |             |             |
| C                                                                                  | -0.48441200               | -1.42655100 | -0.05211800 | C                                                                                   | -1.14590200              | 0.07723500  | -0.08870300 |
| C                                                                                  | -1.93788200               | 0.68390400  | 0.09175000  | C                                                                                   | -0.08602800              | 0.86442300  | -0.38020600 |
| C                                                                                  | 0.66686400                | 2.31297100  | -0.55114100 | O                                                                                   | 1.11380900               | 0.19909600  | -0.51400900 |
| H                                                                                  | 0.24047000                | 2.85565300  | 0.29501500  | C                                                                                   | 2.20264000               | 0.64263800  | 0.23695200  |
| H                                                                                  | 1.72145300                | 2.57673400  | -0.65820600 | O                                                                                   | 2.09132900               | 1.50438800  | 1.08962100  |
| H                                                                                  | 0.14884700                | 2.65204400  | -1.45481300 | N                                                                                   | 3.33457100               | -0.01309400 | -0.11575800 |

F 0.50752700 -1.84343500 0.77956300  
 F -1.62807500 -1.96870400 0.41758500  
 F -0.24667700 -1.98114200 -1.26060200  
 F -2.85339000 0.13091100 -0.73798000  
 F -1.97307200 2.01955400 -0.13062700  
 F -2.37958100 0.49304400 1.35963200

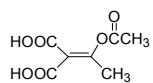

SCF energy= -723.06852

C -0.19334700 -0.81525000 -0.38505300  
 C 0.84046600 0.01537700 -0.11831800  
 O -1.37719300 -0.22741400 -0.79847100  
 C -2.51132500 -0.12107000 0.00563600  
 O -3.52924600 0.24194700 -0.51808900  
 C -2.33829000 -0.41760400 1.47484700  
 H -3.31123400 -0.32947000 1.95985700  
 H -1.93783700 -1.42206800 1.64498900  
 H -1.63929600 0.30151200 1.91359600  
 C -0.21091600 -2.31334900 -0.45972600  
 H 0.57170700 -2.77272800 0.14129400  
 H -1.19040700 -2.69355000 -0.15387100  
 H -0.06074400 -2.61896700 -1.50377500  
 C 0.66596400 1.50683500 -0.24563600  
 O 1.23358400 2.18102900 -1.07136400  
 O -0.19791200 2.01697000 0.66547400  
 H -0.26207400 2.97682400 0.49450800  
 C 2.22182800 -0.37732700 0.25169900  
 O 3.00257200 0.37923400 0.79342800  
 O 2.55658200 -1.65770600 -0.05648100  
 H 3.47649900 -1.77971100 0.24672400

C 3.39852900 -1.10585800 -1.08303400  
 H 4.22432600 -0.92245200 -1.78051800  
 H 3.58024300 -2.05914800 -0.56932000  
 H 2.46847000 -1.17862600 -1.64195300  
 C 4.55344500 0.24919000 0.64317200  
 H 4.82592500 -0.62834000 1.24438500  
 H 5.37576300 0.47082200 -0.04713200  
 H 4.39192000 1.10062800 1.30303800  
 C -0.06110000 2.33764800 -0.68752900  
 H 0.92716200 2.61543700 -1.05591000  
 H -0.80592400 2.59147300 -1.44510400  
 H -0.26640200 2.93041500 0.20809700  
 C -2.56718200 0.56955500 0.00708200  
 C -0.93830800 -1.40843700 0.14933400  
 F -2.68211800 1.90133700 -0.20350900  
 F -3.09930800 0.32772900 1.22961500  
 F -3.37330000 -0.03637300 -0.90246500  
 F -2.08950700 -2.03467300 0.47351400  
 F -0.45275200 -2.03930700 -0.95265600  
 F -0.06314200 -1.65369000 1.15632600

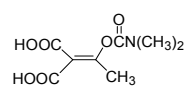

SCF energy=-817.7619416

C -0.42944200 -0.78541700 -0.33803300  
 C -1.47729500 0.01574300 -0.03248900  
 O 0.77582400 -0.11479800 -0.45713300  
 C 1.89823000 -0.60390200 0.20500000  
 O 1.84502300 -1.53044000 0.99208800  
 C -0.41887100 -2.24735300 -0.66661900  
 C -1.21822700 1.47038300 0.27369700

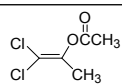

SCF energy= -1265.0597385

C -0.05288500 0.77686100 -0.36866000  
 C -1.02162200 -0.12425900 -0.13075200  
 O 1.18382000 0.33230200 -0.81497100  
 C 2.21547500 -0.01316600 0.04650900  
 O 3.26938900 -0.32299200 -0.44231200  
 C 1.92227400 0.01299500 1.52884800  
 H 2.85936100 -0.15011600 2.06257500  
 H 1.48061800 0.96417700 1.84256000  
 H 1.21655300 -0.78332300 1.78880800  
 C -0.18951900 2.26862100 -0.35152800  
 H -1.18782400 2.58948000 -0.05297100  
 H 0.54293800 2.71398400 0.33383700  
 H 0.02587300 2.66042300 -1.35344900  
 Cl -2.63942700 0.33182800 0.32766900  
 Cl -0.76089800 -1.83744000 -0.26352700

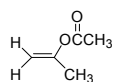

SCF energy= -345.8378426

C 1.15853300 -0.00818200 -0.21437200  
 C 1.62773300 1.14543300 -0.69199400  
 O -0.08492600 -0.49153800 -0.64585700  
 C -1.27913000 -0.11220300 -0.08184200  
 O -2.29450000 -0.59163400 -0.52291100  
 C -1.23861200 0.89231600 1.05038200  
 H -2.23421300 0.94112000 1.49331000  
 H -0.50415100 0.61990900 1.81470300  
 H -0.96318700 1.88303400 0.67442700  
 C 1.88000500 -0.97286900 0.67833700  
 H 2.87369300 -0.59853500 0.93996300

O -0.75344500 1.89402800 1.30747500  
 O -1.56749900 2.26645700 -0.76278800  
 H -1.44071600 3.18989200 -0.47115500  
 C -2.89799300 -0.36033800 0.09070600  
 O -3.76561600 0.43105300 0.41302700  
 O -3.18414300 -1.66611000 -0.15763800  
 H -4.14519900 -1.76113500 -0.01794900  
 N 3.00896600 0.09121100 -0.15242000  
 C 2.99789100 1.27229600 -1.01130500  
 H 2.98929700 2.19404300 -0.41322900  
 H 3.90256700 1.26533000 -1.62894100  
 H 2.12622600 1.26403600 -1.66275200  
 C 4.24891400 -0.17205100 0.57111800  
 H 5.07332800 -0.28273100 -0.14245300  
 H 4.48186300 0.65714000 1.25315700  
 H 4.14082300 -1.08953900 1.14817500  
 H -0.26679500 -2.83979400 0.24146600  
 H 0.41266400 -2.46243800 -1.34372400  
 H -1.35720400 -2.55096400 -1.12834400

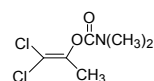

SCF energy=-1359.7526402

C 0.74664900 -0.66305900 0.40216800  
 C 1.71822100 0.18861000 0.03867300  
 O -0.51568100 -0.12173900 0.62418600  
 C -1.51249800 -0.44430000 -0.28413100  
 O -1.30408100 -1.12459100 -1.27391000  
 C 0.88932200 -2.12098900 0.70701700  
 Cl 3.38039300 -0.30159000 -0.14297600  
 Cl 1.42183900 1.87267300 -0.27908100  
 N -2.70823600 0.08417300 0.08910400

|                                                                                     |                          |             |                                                                                   |                         |             |
|-------------------------------------------------------------------------------------|--------------------------|-------------|-----------------------------------------------------------------------------------|-------------------------|-------------|
| H 1.31957400                                                                        | -1.15589000              | 1.60441100  | C -2.90469000                                                                     | 0.96509000              | 1.23497300  |
| H 1.98860700                                                                        | -1.94047300              | 0.17302600  | H -3.10562500                                                                     | 1.99232800              | 0.90068700  |
| H 2.61480700                                                                        | 1.49749000               | -0.41090500 | H -3.76579800                                                                     | 0.61650100              | 1.81835400  |
| H 1.04910200                                                                        | 1.75174900               | -1.38185300 | H -2.02206700                                                                     | 0.96652700              | 1.87057000  |
| 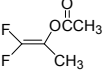   | SCF energy= -544.3565717 |             | C -3.85577400                                                                     | -0.09384700             | -0.79211700 |
| C -0.54326600                                                                       | 0.61700000               | -0.21496300 | H -4.70173400                                                                     | -0.49867700             | -0.22311500 |
| C -1.37125100                                                                       | -0.42338100              | -0.13704000 | H -4.15692000                                                                     | 0.86774600              | -1.22971900 |
| O 0.71500900                                                                        | 0.42522800               | -0.77676300 | H -3.59182800                                                                     | -0.78460200             | -1.59202200 |
| C 1.79100600                                                                        | -0.05195300              | -0.04653800 | H 0.53151200                                                                      | -2.31895200             | 1.72552000  |
| O 2.85160500                                                                        | -0.13770800              | -0.60805700 | H 1.92531800                                                                      | -2.45227500             | 0.62876400  |
| C 1.54511300                                                                        | -0.44222000              | 1.39358300  | H 0.27756600                                                                      | -2.70462300             | 0.01049600  |
| H 2.51259000                                                                        | -0.63253800              | 1.85997400  |  | SCF energy=-440.5307125 |             |
| H 1.01508700                                                                        | 0.33943100               | 1.94677600  | C 1.90013400                                                                      | 0.22695900              | -0.01152300 |
| H 0.94092000                                                                        | -1.35491600              | 1.44377800  | C 2.64678000                                                                      | 0.84255600              | -0.92775900 |
| C -0.90493100                                                                       | 2.03045800               | 0.11763100  | O 0.54575300                                                                      | 0.59794800              | 0.07589000  |
| H -1.93735200                                                                       | 2.10639800               | 0.46766300  | C -0.40888900                                                                     | -0.36369700             | -0.15527400 |
| H -0.24303900                                                                       | 2.42991600               | 0.89693600  | O -0.14586400                                                                     | -1.49245400             | -0.53931600 |
| H -0.78640800                                                                       | 2.66281100               | -0.77058700 | C 2.37209800                                                                      | -0.73724800             | 1.03438200  |
| F -2.62735100                                                                       | -0.35205200              | 0.30404000  | H 3.71400900                                                                      | 0.65636600              | -0.98274000 |
| F -1.05428600                                                                       | -1.67358000              | -0.46426500 | H 2.20995300                                                                      | 1.53910800              | -1.63579800 |
|  | SCF energy= -424.4830925 |             | N -1.66309800                                                                     | 0.11139600              | 0.10031600  |
| C -0.50042100                                                                       | 0.58431500               | -0.28741500 | C -1.95748300                                                                     | 1.49516600              | 0.45182400  |
| C -1.43844100                                                                       | -0.35748800              | -0.09091000 | H -2.33456700                                                                     | 2.05194100              | -0.41868600 |
| O 0.75375500                                                                        | 0.20864700               | -0.81869300 | H -2.72894400                                                                     | 1.51098400              | 1.23088200  |
| C 1.82330100                                                                        | -0.11256200              | -0.02640000 | H -1.06398900                                                                     | 1.98985300              | 0.82734700  |
| O 2.87735100                                                                        | -0.36702700              | -0.55946700 | C -2.80682400                                                                     | -0.72974800             | -0.22613900 |
| C 1.60549900                                                                        | -0.15864300              | 1.47241300  | H -3.50492800                                                                     | -0.74978400             | 0.61954400  |
| H 2.57447600                                                                        | -0.30373900              | 1.95192200  | H -3.33745800                                                                     | -0.34136500             | -1.10732900 |
|                                                                                     |                          |             | H -2.46009500                                                                     | -1.74103300             | -0.43564400 |



|               |                         |             |               |                         |             |
|---------------|-------------------------|-------------|---------------|-------------------------|-------------|
| H 1.13991600  | 0.75760700              | 1.84804100  | H 1.88589500  | -1.71023800             | 0.91277300  |
| H 0.94458000  | -0.99167900             | 1.73540300  | H 3.45529400  | -0.87271400             | 0.96425100  |
| C -1.18140800 | -1.82223000             | -0.35408200 | H 2.13250900  | -0.36076500             | 2.03751700  |
| H -0.22141400 | -2.00260900             | -0.84159200 |               | SCF energy=-639.050075  |             |
| H -1.21285900 | -2.40025300             | 0.58130300  | C 2.12805100  | -0.47890300             | -0.14627800 |
| H -1.97079900 | -2.23324900             | -0.99789500 | C 1.25674100  | 0.36810500              | 0.39472500  |
| C -2.83298400 | -0.04729500             | 0.39796600  | O -0.03529200 | -0.11420100             | 0.60256700  |
| H -3.06448700 | -0.64353400             | 1.29164100  | C -1.01668700 | 0.36714400              | -0.24984300 |
| H -2.98962500 | 1.00312900              | 0.65135500  | O -0.77246400 | 1.12678900              | -1.17145900 |
| H -3.57626700 | -0.32428700             | -0.36288300 | N -2.24466600 | -0.10548600             | 0.09578400  |
| C -0.60975200 | 2.07790000              | -0.17307500 | C -2.47970200 | -1.10074200             | 1.13624600  |
| H -1.59455300 | 2.40451000              | 0.16499500  | H -3.36172300 | -0.80939100             | 1.71871200  |
| H 0.13886700  | 2.48076100              | 0.52238300  | H -2.66619100 | -2.09049100             | 0.69577400  |
| H -0.41145300 | 2.53639900              | -1.15037700 | H -1.62129700 | -1.16571200             | 1.80140200  |
|               | SCF energy=-456.5822562 |             | C -3.38167100 | 0.22254900              | -0.75559000 |
| C -0.52890500 | 0.59990200              | -0.29810400 | H -3.72118400 | -0.66494700             | -1.30758800 |
| C -1.38931800 | -0.42211800             | -0.09196100 | H -4.21135400 | 0.58922700              | -0.13938100 |
| O 0.73873600  | 0.26331400              | -0.82781800 | H -3.08735600 | 0.99428600              | -1.46589400 |
| C 1.78620700  | -0.08374800             | -0.00989800 | C 1.57691900  | 1.74376400              | 0.88445400  |
| O 2.83962700  | -0.37642200             | -0.52551100 | H 0.98973400  | 2.48744500              | 0.33457300  |
| C 1.53842000  | -0.09562900             | 1.48286300  | H 1.33479200  | 1.83182800              | 1.95131700  |
| H 2.48575500  | -0.30394000             | 1.98230500  | H 2.63786300  | 1.96961300              | 0.75007500  |
| H 1.13833400  | 0.86068300              | 1.83451100  | F 1.84047000  | -1.70479700             | -0.57542100 |
| H 0.81043700  | -0.87411300             | 1.73514500  | F 3.42392200  | -0.21027500             | -0.31798200 |
| C -0.78427300 | 2.07165700              | -0.20684700 |               | SCF energy=-519.1745577 |             |
| H -1.84814000 | 2.29569300              | -0.07120300 | C -2.18613500 | 0.43220700              | -0.07309700 |
| H -0.23833300 | 2.55075500              | 0.62035400  | C -1.24649700 | -0.41607800             | 0.37089900  |
| H -0.46071200 | 2.56651700              | -1.13231400 | O 0.06282300  | 0.08696100              | 0.57187900  |
| N -2.65564600 | -0.29250200             | 0.51335100  |               |                         |             |

|   |             |             |             |
|---|-------------|-------------|-------------|
| H | -2.85872400 | 0.64382600  | 0.84251100  |
| H | -3.42029900 | -0.62934600 | -0.06877800 |
| N | -1.02313200 | -1.74929500 | -0.34033100 |
| H | -1.75852500 | -2.43258900 | -0.21577100 |
| H | -0.45803500 | -1.90043400 | -1.16758900 |

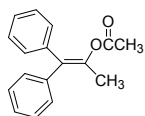

SCF energy= -807.9859664

|   |             |             |             |
|---|-------------|-------------|-------------|
| C | -0.33366700 | -1.49054400 | -0.60519400 |
| C | 0.21447400  | -0.28849900 | -0.31540700 |
| O | -1.72117700 | -1.62423800 | -0.76949600 |
| C | -2.59940200 | -1.76551800 | 0.27869900  |
| O | -3.77454300 | -1.86523200 | 0.02345600  |
| C | -2.02823700 | -1.78372500 | 1.67905300  |
| H | -1.18009400 | -2.47049000 | 1.76487200  |
| H | -1.67643900 | -0.78407100 | 1.95536100  |
| H | -2.82127000 | -2.08669700 | 2.36421400  |
| C | 0.36820600  | -2.77156200 | -0.94892900 |
| H | 0.16916700  | -3.55232000 | -0.20142800 |
| H | -0.02177800 | -3.14440200 | -1.90468300 |
| H | 1.44778600  | -2.64105100 | -1.03434300 |
| C | 1.69513400  | -0.15814500 | -0.13748200 |
| C | 2.41909300  | 0.76099000  | -0.91753700 |
| C | 2.39229900  | -0.91210600 | 0.82046200  |
| C | 3.79853600  | 0.90219700  | -0.76151500 |
| H | 1.89341500  | 1.36414400  | -1.65329700 |
| C | 3.77325800  | -0.76772100 | 0.98297400  |
| H | 1.84648000  | -1.61017900 | 1.45049100  |
| C | 4.48197000  | 0.13783700  | 0.19009500  |
| H | 4.34039900  | 1.61139900  | -1.38225300 |
| H | 4.29174900  | -1.35918700 | 1.73361700  |

|   |             |             |             |
|---|-------------|-------------|-------------|
| C | 1.03902200  | -0.32248100 | -0.30026800 |
| O | 0.81396500  | -0.99540900 | -1.29477900 |
| N | 2.27416700  | 0.11464700  | 0.08954000  |
| C | 2.51627600  | 0.97463800  | 1.24005000  |
| H | 3.36910700  | 0.58688600  | 1.81138600  |
| H | 2.75506300  | 1.99982000  | 0.92072500  |
| H | 1.64005600  | 0.99963200  | 1.88459800  |
| C | 3.41402700  | -0.13615500 | -0.78070600 |
| H | 3.78392800  | 0.80268600  | -1.21734900 |
| H | 4.22857000  | -0.59579000 | -0.20660500 |
| H | 3.11082900  | -0.80856600 | -1.58243500 |
| C | -1.37458400 | -1.84652000 | 0.80401400  |
| H | -0.74563000 | -2.48956500 | 0.17750700  |
| H | -1.03814600 | -1.95855000 | 1.84352300  |
| H | -2.40158000 | -2.20985500 | 0.73909500  |
| C | -3.63767100 | 0.04826700  | -0.23227900 |
| H | -3.85677800 | -0.98154500 | 0.05638800  |
| H | -4.27751600 | 0.70904700  | 0.36985000  |
| H | -3.95187700 | 0.17550100  | -1.27772800 |
| C | -1.87601400 | 1.85608200  | -0.46737200 |
| H | -2.49065000 | 2.55926600  | 0.11261600  |
| H | -0.82666900 | 2.11509200  | -0.31693800 |
| H | -2.12272500 | 2.02124300  | -1.52565900 |

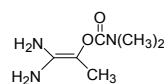

SCF energy=-551.2594314

|   |             |             |             |
|---|-------------|-------------|-------------|
| C | 1.18537000  | 0.45792000  | 0.43217900  |
| C | 1.64046700  | -0.61045800 | -0.26423900 |
| O | 0.02478800  | 0.32500200  | 1.23409100  |
| C | -1.13533700 | -0.25368300 | 0.74920900  |
| O | -1.60388500 | -1.22314700 | 1.32552000  |

|   |             |            |             |
|---|-------------|------------|-------------|
| H | 5.55562400  | 0.25186100 | 0.31544000  |
| C | -0.58634600 | 0.96240100 | -0.15014400 |
| C | -1.65278700 | 1.28966800 | -1.00856700 |
| C | -0.25246600 | 1.87273900 | 0.87098200  |
| C | -2.36455000 | 2.47874200 | -0.84131300 |
| H | -1.92444200 | 0.61091700 | -1.80987100 |
| C | -0.97125300 | 3.05689700 | 1.04311000  |
| H | 0.57950900  | 1.65030400 | 1.53379700  |
| C | -2.03150500 | 3.36557100 | 0.18661800  |
| H | -3.18250400 | 2.71104100 | -1.51855500 |
| H | -0.69855600 | 3.73992800 | 1.84383400  |
| H | -2.58983500 | 4.28922600 | 0.31570300  |

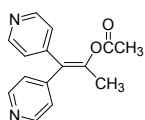

SCF energy= -840.0697552

|   |             |             |             |
|---|-------------|-------------|-------------|
| C | -0.35282300 | -1.48863700 | -0.59168100 |
| C | 0.21399100  | -0.29373300 | -0.30520000 |
| O | -1.73462100 | -1.59456200 | -0.77040100 |
| C | -2.63740400 | -1.72424000 | 0.26643100  |
| O | -3.80653700 | -1.79616100 | -0.01371600 |
| C | -2.08769100 | -1.76247600 | 1.67397800  |
| H | -1.25730400 | -2.46941600 | 1.76881600  |
| H | -1.71875900 | -0.77260600 | 1.96305700  |
| H | -2.89721300 | -2.05094500 | 2.34579400  |
| C | 0.33302800  | -2.78297900 | -0.91530300 |
| H | 0.10061200  | -3.55478000 | -0.16887900 |
| H | -0.04660200 | -3.15108900 | -1.87672400 |
| H | 1.41645100  | -2.67699600 | -0.98059100 |
| C | -0.56630500 | 0.96902700  | -0.14646200 |
| C | -1.64657300 | 1.31336500  | -0.97615300 |
| C | -0.21155600 | 1.89965100  | 0.84572700  |

|   |             |             |             |
|---|-------------|-------------|-------------|
| C | 1.89731100  | 1.75187200  | 0.67767900  |
| N | 2.71937400  | -0.54991200 | -1.17889900 |
| H | 3.05186300  | 0.39099400  | -1.35421000 |
| H | 3.50012300  | -1.14821600 | -0.91233000 |
| N | 1.01288000  | -1.85244500 | -0.24735000 |
| H | 1.41221100  | -2.56823700 | -0.83696000 |
| H | 0.59376700  | -2.17127700 | 0.61771100  |
| N | -1.70938800 | 0.35384800  | -0.32735300 |
| C | -1.29872200 | 1.63825100  | -0.87433700 |
| H | -0.66114100 | 1.51967700  | -1.76081200 |
| H | -2.19644100 | 2.19832700  | -1.16217800 |
| H | -0.76398200 | 2.21806500  | -0.12305600 |
| C | -2.84499900 | -0.29065500 | -0.97535500 |
| H | -3.76647700 | 0.28387000  | -0.80835700 |
| H | -2.66468900 | -0.35881700 | -2.05573400 |
| H | -2.97168200 | -1.29070000 | -0.56279700 |
| H | 2.94772300  | 1.69972300  | 0.37140100  |
| H | 1.44316900  | 2.61201500  | 0.16264300  |
| H | 1.88372400  | 1.97982500  | 1.75218300  |

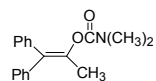

SCF energy=-902.6769579

|   |             |             |             |
|---|-------------|-------------|-------------|
| C | 0.69820700  | -0.17582300 | -0.30566200 |
| C | -0.17663600 | -1.14842200 | -0.63293500 |
| O | -1.54129800 | -0.81522100 | -0.73752000 |
| C | -2.35530100 | -1.23412200 | 0.28994100  |
| O | -1.93511400 | -1.81180000 | 1.28027700  |
| N | -3.66429900 | -0.93674900 | 0.04345100  |
| C | -4.11534300 | -0.13724700 | -1.08887100 |
| H | -5.07466300 | -0.53238500 | -1.44285900 |
| H | -4.25696300 | 0.91514900  | -0.80306300 |

|                                                                                     |             |             |             |   |             |             |             |
|-------------------------------------------------------------------------------------|-------------|-------------|-------------|---|-------------|-------------|-------------|
| C                                                                                   | -2.30210200 | 2.52877600  | -0.77224800 | H | -3.39195000 | -0.18846800 | -1.90050900 |
| H                                                                                   | -1.97437000 | 0.65137300  | -1.76965900 | C | -4.64175700 | -1.18002200 | 1.09606500  |
| C                                                                                   | -0.93888000 | 3.08406600  | 0.96918800  | H | -4.96371700 | -0.23519200 | 1.55727000  |
| H                                                                                   | 0.62252000  | 1.70843800  | 1.51473500  | H | -5.52208600 | -1.67998000 | 0.67459200  |
| N                                                                                   | -1.97122900 | 3.41119200  | 0.18085000  | H | -4.19430700 | -1.81465600 | 1.86019700  |
| H                                                                                   | -3.13762000 | 2.80731000  | -1.41154300 | C | 0.10362000  | -2.57016500 | -1.01591500 |
| H                                                                                   | -0.67614000 | 3.80786200  | 1.73865500  | H | -0.27746200 | -3.26169100 | -0.25489300 |
| C                                                                                   | 1.69464900  | -0.17967100 | -0.13023000 | H | -0.41234900 | -2.79890800 | -1.95794400 |
| C                                                                                   | 2.43960000  | 0.72373400  | -0.90419600 | H | 1.17129800  | -2.75065100 | -1.15185600 |
| C                                                                                   | 2.40056100  | -0.93086300 | 0.82004600  | C | 0.27384600  | 1.23772400  | -0.06643100 |
| C                                                                                   | 3.81850100  | 0.81344400  | -0.71187200 | C | -0.48100100 | 1.95282400  | -1.01178800 |
| H                                                                                   | 1.95294500  | 1.34544800  | -1.65043000 | C | 0.66979000  | 1.89998900  | 1.10853400  |
| C                                                                                   | 3.78261900  | -0.76203900 | 0.93859500  | C | -0.83795700 | 3.28394100  | -0.78449200 |
| H                                                                                   | 1.88298800  | -1.63134200 | 1.46976500  | H | -0.78084600 | 1.46184000  | -1.93290500 |
| N                                                                                   | 4.49574200  | 0.08930400  | 0.19116300  | C | 0.30385700  | 3.22675000  | 1.34241300  |
| H                                                                                   | 4.41043000  | 1.50156900  | -1.31237300 | H | 1.26354500  | 1.36587900  | 1.84560900  |
| H                                                                                   | 4.34206200  | -1.33707100 | 1.67450300  | C | -0.45082400 | 3.92555900  | 0.39559200  |
| 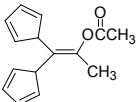 |             |             |             | H | -1.41436300 | 3.82187700  | -1.53365100 |
| SCF energy= -731.6858103                                                            |             |             |             | H | 0.61224900  | 3.71561500  | 2.26333200  |
| C                                                                                   | -0.45776800 | -1.23208400 | -0.50155700 | H | -0.72905900 | 4.96151400  | 0.57262900  |
| C                                                                                   | 0.56318900  | -0.40445200 | -0.22754900 | C | 2.15462900  | -0.46958500 | -0.14007600 |
| O                                                                                   | -1.73432900 | -0.65159500 | -0.66023100 | C | 3.11526600  | 0.29291400  | -0.82800200 |
| C                                                                                   | -2.67831900 | -0.86663100 | 0.30190800  | C | 2.60186900  | -1.47438500 | 0.73437700  |
| C                                                                                   | -0.46606400 | -2.70763700 | -0.77466800 | C | 4.47829000  | 0.03803800  | -0.67062700 |
| H                                                                                   | 0.53364600  | -3.14555700 | -0.76855600 | H | 2.78732500  | 1.08874700  | -1.49199600 |
| H                                                                                   | -1.07163200 | -3.22863900 | -0.02437400 | C | 3.96689700  | -1.72685400 | 0.89723100  |
| H                                                                                   | -0.91418500 | -2.89973400 | -1.75844200 | H | 1.87238100  | -2.04840700 | 1.29963700  |
| C                                                                                   | 0.36560300  | 1.09468900  | -0.00591700 | C | 4.90997300  | -0.97491800 | 0.19213700  |
| H                                                                                   | 1.36495000  | 1.50254700  | 0.22920700  | H | 5.20441200  | 0.63259300  | -1.21972800 |
| C                                                                                   | -0.14649300 | 1.92318700  | -1.16746700 | H | 4.29150400  | -2.50659800 | 1.58202700  |

|   |             |             |             |
|---|-------------|-------------|-------------|
| C | -0.52954600 | 1.54205200  | 1.13214500  |
| H | 0.25277000  | 1.84707200  | -2.17278700 |
| C | -1.09471200 | 2.77813800  | -0.72606900 |
| H | -0.46557500 | 1.13384100  | 2.13445500  |
| C | -1.33244600 | 2.54132300  | 0.70393400  |
| H | -1.60599800 | 3.52968800  | -1.32003700 |
| H | -2.04039700 | 3.09704200  | 1.31166400  |
| C | 1.99802400  | -0.89850500 | -0.10971300 |
| H | 2.03316800  | -1.98012100 | -0.30158100 |
| C | 2.98128100  | -0.23019600 | -1.05207700 |
| C | 2.63369400  | -0.65365500 | 1.24607900  |
| H | 2.84595500  | -0.19746000 | -2.12779800 |
| C | 4.01969500  | 0.26676700  | -0.34464000 |
| H | 2.19080900  | -0.99052700 | 2.17700600  |
| C | 3.80302700  | 0.00388800  | 1.08563000  |
| H | 4.88806700  | 0.77620800  | -0.75098300 |
| H | 4.48993300  | 0.29415500  | 1.87461900  |
| O | -2.47790000 | -1.50929100 | 1.30892100  |
| C | -3.97892000 | -0.20862800 | -0.08217900 |
| H | -4.69678500 | -0.31804000 | 0.73204600  |
| H | -3.81013000 | 0.85053000  | -0.30023500 |
| H | -4.37824300 | -0.67346200 | -0.99088600 |

|   |            |             |            |
|---|------------|-------------|------------|
| H | 5.97188300 | -1.17003400 | 0.31896200 |
|---|------------|-------------|------------|

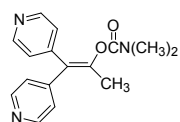

SCF energy=-934.7625097

|   |             |             |             |
|---|-------------|-------------|-------------|
| C | 0.69925700  | -0.18150600 | -0.29731300 |
| C | -0.19175800 | -1.14434600 | -0.61262100 |
| O | -1.54415800 | -0.78759500 | -0.72525800 |
| C | -2.37397000 | -1.20093200 | 0.29969900  |
| O | -1.95689900 | -1.77009200 | 1.29547900  |
| N | -3.67620300 | -0.90153100 | 0.03892700  |
| C | -4.12093200 | -0.12776300 | -1.11454500 |
| H | -5.07127500 | -0.53964700 | -1.47279200 |
| H | -4.27777900 | 0.92721700  | -0.84851200 |
| H | -3.38762100 | -0.18632500 | -1.91670800 |
| C | -4.66715200 | -1.14002000 | 1.08175400  |
| H | -5.01275800 | -0.19039200 | 1.51363900  |
| H | -5.53052500 | -1.66606400 | 0.65753600  |
| H | -4.22105400 | -1.74837700 | 1.86759200  |
| C | 0.06999500  | -2.57508800 | -0.97311600 |
| H | -0.32351300 | -3.24680400 | -0.20122400 |
| H | -0.45005800 | -2.80879300 | -1.91115300 |
| H | 1.13408200  | -2.77593800 | -1.10690800 |
| C | 0.29515500  | 1.23698300  | -0.06440300 |
| C | -0.47208300 | 1.96383700  | -0.98720400 |
| C | 0.71316400  | 1.91994900  | 1.08784300  |
| C | -0.78436300 | 3.29689700  | -0.71659300 |
| H | -0.81381900 | 1.50037900  | -1.90710200 |
| C | 0.33775400  | 3.25183600  | 1.26882500  |
| H | 1.31688000  | 1.41964800  | 1.83963700  |
| N | -0.39846700 | 3.94655100  | 0.39026900  |
| H | -1.37223400 | 3.87472900  | -1.42814900 |

---

|   |            |             |             |
|---|------------|-------------|-------------|
| H | 0.64604500 | 3.78914700  | 2.16390900  |
| C | 2.15180000 | -0.48758500 | -0.13798100 |
| C | 3.12676300 | 0.26155100  | -0.81531000 |
| C | 2.61147700 | -1.49610100 | 0.72181000  |
| C | 4.47521700 | -0.04331500 | -0.62833800 |
| H | 2.83996000 | 1.06926900  | -1.48306300 |
| C | 3.98544100 | -1.71772900 | 0.84264100  |
| H | 1.90971900 | -2.08834300 | 1.30203300  |
| N | 4.91610500 | -1.01566700 | 0.18311900  |
| H | 5.24164500 | 0.52188200  | -1.15565100 |
| H | 4.35612600 | -2.49557400 | 1.50806600  |

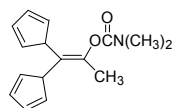

SCF energy=-826.3780833

|   |             |             |             |
|---|-------------|-------------|-------------|
| C | -0.67041200 | -0.54422700 | 0.09885900  |
| C | 0.45031000  | -1.28669800 | 0.13551100  |
| O | 1.64676800  | -0.67427600 | 0.58035600  |
| C | 2.57694800  | -0.34453900 | -0.37682300 |
| O | 2.36566300  | -0.44836600 | -1.57561000 |
| N | 3.73940400  | 0.09728200  | 0.18494700  |
| C | 3.93662800  | 0.29107900  | 1.61619700  |
| H | 4.92928400  | -0.08164800 | 1.89646700  |
| H | 3.88110100  | 1.35690100  | 1.88148500  |
| H | 3.18204300  | -0.25375500 | 2.17992200  |
| C | 4.78991600  | 0.60465400  | -0.68757600 |
| H | 4.89008200  | 1.69438600  | -0.58333600 |
| H | 5.74819500  | 0.14072600  | -0.42340200 |
| H | 4.54334100  | 0.36534300  | -1.72135800 |
| C | 0.65628300  | -2.74804300 | -0.13555300 |
| H | 1.37658100  | -2.88057200 | -0.95183300 |
| H | 1.06866900  | -3.23784700 | 0.75652100  |

---

---

|   |             |             |             |
|---|-------------|-------------|-------------|
| H | -0.26490400 | -3.26692000 | -0.40544100 |
| C | -2.00910800 | -1.16787900 | -0.27156000 |
| H | -1.80950700 | -2.11925800 | -0.78946700 |
| C | -2.94154600 | -1.50858700 | 0.87753700  |
| C | -2.91587200 | -0.39520300 | -1.20717000 |
| H | -2.62178900 | -2.05277900 | 1.75974800  |
| C | -4.18964300 | -1.08429100 | 0.58172500  |
| H | -2.57841800 | 0.03323900  | -2.14336700 |
| C | -4.17362000 | -0.39518200 | -0.71447100 |
| H | -5.07621900 | -1.22505600 | 1.19277300  |
| H | -5.04695000 | 0.04013700  | -1.19009500 |
| C | -0.60571400 | 0.94602700  | 0.40985800  |
| H | 0.30768700  | 1.10594800  | 1.00584600  |
| C | -0.48555800 | 1.86661500  | -0.79182900 |
| C | -1.73340700 | 1.57824900  | 1.19527300  |
| H | 0.22235500  | 1.69386600  | -1.59490400 |
| C | -1.34012300 | 2.90318600  | -0.64593600 |
| H | -2.11575900 | 1.17441100  | 2.12535200  |
| C | -2.11117500 | 2.72635400  | 0.59044600  |
| H | -1.45052400 | 3.74316800  | -1.32524000 |
| H | -2.86398900 | 3.42078900  | 0.95078800  |

---

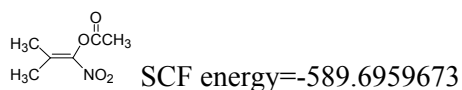

|   |             |             |             |
|---|-------------|-------------|-------------|
| C | -0.37986500 | 0.01033000  | -0.28727900 |
| C | -1.32761500 | -0.92097000 | -0.04209800 |
| O | 0.85387300  | -0.29516900 | -0.78769400 |
| C | 2.01306700  | -0.31155200 | -0.00182300 |
| O | 3.04744800  | -0.53537400 | -0.56636000 |
| C | 1.85209900  | -0.08323400 | 1.48025800  |
| H | 2.80860300  | -0.29233200 | 1.96094400  |
| H | 1.57359600  | 0.95821800  | 1.67047800  |
| H | 1.07669100  | -0.72809900 | 1.90613000  |
| C | -2.73632900 | -0.64439400 | 0.41793300  |
| H | -3.34060500 | -0.24257600 | -0.40429300 |
| H | -3.19845700 | -1.57517700 | 0.76162800  |
| H | -2.78065100 | 0.09739700  | 1.21896000  |
| C | -0.98664000 | -2.37542200 | -0.24020000 |
| H | -0.00191300 | -2.53189100 | -0.68164600 |
| H | -1.03886200 | -2.90693800 | 0.72024000  |
| H | -1.74086600 | -2.83736500 | -0.89090000 |
| N | -0.60390800 | 1.46150300  | -0.17817700 |
| O | 0.39261400  | 2.18458600  | -0.22250600 |
| O | -1.76124500 | 1.86842000  | -0.04532000 |

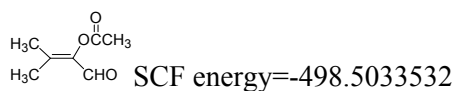

|   |             |             |             |
|---|-------------|-------------|-------------|
| C | -0.49503300 | 0.27979800  | -0.24105900 |
| C | -1.66900400 | -0.36115900 | -0.00720400 |
| O | 0.59247200  | -0.45752400 | -0.69128600 |
| C | 1.78253000  | -0.57453800 | 0.00299900  |
| O | 2.69440500  | -1.13326300 | -0.55117400 |
| C | 1.84099900  | -0.04120000 | 1.41559500  |

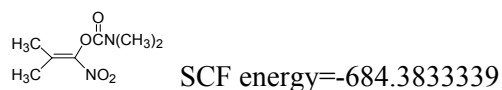

|   |             |             |             |
|---|-------------|-------------|-------------|
| C | -0.86462000 | 0.01900100  | -0.33285100 |
| C | -2.04332500 | -0.57921300 | -0.05953700 |
| O | 0.13265000  | -0.63008300 | -1.00113300 |
| C | 1.50001100  | -0.41740800 | -0.72865600 |
| O | 2.26131000  | -0.35985500 | -1.66382800 |
| C | -3.27121400 | 0.10317900  | 0.48713600  |
| H | -3.36896800 | 1.14080100  | 0.16330000  |
| H | -4.16183600 | -0.45597200 | 0.17987900  |
| H | -3.24902600 | 0.11705300  | 1.58464600  |
| C | -2.19920600 | -2.05042300 | -0.34887800 |
| H | -1.26021100 | -2.53676000 | -0.61658800 |
| H | -2.63668800 | -2.55658300 | 0.52209700  |
| H | -2.90374000 | -2.19182500 | -1.18024100 |
| N | 1.83642500  | -0.30512600 | 0.59097400  |
| C | 1.15762800  | -1.00387800 | 1.68275600  |
| H | 1.83520100  | -1.75542100 | 2.11034100  |
| H | 0.87073000  | -0.30155800 | 2.47417600  |
| H | 0.26704600  | -1.51723600 | 1.32568100  |
| C | 3.21321800  | 0.09976500  | 0.87482700  |
| H | 3.23695800  | 0.58249100  | 1.85687200  |
| H | 3.89250700  | -0.76404000 | 0.88152500  |
| H | 3.54977900  | 0.80561000  | 0.11562000  |
| N | -0.63227800 | 1.45916000  | -0.13072300 |
| O | 0.21116500  | 2.00070700  | -0.84359500 |
| O | -1.28709300 | 2.03036400  | 0.74757500  |

  

SCF energy=-593.1961466

|   |            |            |             |
|---|------------|------------|-------------|
| C | 1.17120600 | 0.29926800 | -0.19003200 |
|---|------------|------------|-------------|



|               |                          |             |               |                         |             |
|---------------|--------------------------|-------------|---------------|-------------------------|-------------|
| H 2.65782300  | -0.54559800              | 1.93458200  | C 2.24610800  | -0.51474100             | -0.07898000 |
| H 2.04981800  | 1.03287300               | 1.38759800  | O -0.06414400 | -0.22934800             | -0.55276400 |
| H 0.90336600  | -0.19382400              | 1.95882100  | C -1.03995700 | -0.20782600             | 0.43085400  |
| C -2.95539600 | 0.33059900               | 0.36768700  | O -0.76913900 | -0.10567200             | 1.61484700  |
| H -2.87324200 | 1.40864400               | 0.50798800  | C 3.64652300  | -0.03037300             | 0.20010900  |
| H -3.71459600 | 0.14577300               | -0.40435800 | H 3.73965800  | 1.04937200              | 0.32005500  |
| H -3.34776300 | -0.10031100              | 1.29843600  | H 4.02442400  | -0.50560600             | 1.11509400  |
| C -1.77612300 | -1.85809300              | -0.12190500 | H 4.31728500  | -0.33856900             | -0.61337600 |
| H -0.86022200 | -2.31662900              | -0.49585100 | C 2.11994600  | -2.00627200             | -0.23206600 |
| H -2.01880000 | -2.29588800              | 0.85692900  | H 1.10080200  | -2.31789100             | -0.46274500 |
| H -2.60318200 | -2.12415900              | -0.79384600 | H 2.78800200  | -2.36584600             | -1.02684400 |
| C -0.30291200 | 1.74209700               | -0.22010900 | H 2.43726500  | -2.50318800             | 0.69511900  |
| O 0.76957900  | 2.28239400               | -0.43646000 | N -2.28229400 | -0.38839900             | -0.09429000 |
| H -1.19520600 | 2.35123000               | 0.00503500  | C -2.58890600 | -0.25283300             | -1.51445400 |
|               | SCF energy= -573.7764375 |             | H -3.32452100 | -1.01496500             | -1.79709000 |
| C -0.38268400 | -0.01880200              | -0.26287700 | H -3.01164700 | 0.73908300              | -1.72883400 |
| C -1.24312000 | -1.03756100              | -0.02787000 | H -1.68924200 | -0.38790000             | -2.11083800 |
| O 0.88390400  | -0.30909000              | -0.76685400 | C -3.42104600 | -0.35338300             | 0.81518600  |
| C 2.03590100  | -0.23699900              | -0.00700000 | H -3.90676200 | 0.63281900              | 0.79865600  |
| O 3.08145400  | -0.46440900              | -0.56054500 | H -4.15228800 | -1.11033800             | 0.50965200  |
| C 1.89636900  | 0.09134500               | 1.46089400  | H -3.08048500 | -0.56132300             | 1.82902700  |
| H 2.85204400  | -0.11030700              | 1.94673800  | C 1.17135600  | 1.76715900              | -0.05231700 |
| H 1.64962000  | 1.15136300               | 1.57846500  | O 0.17977900  | 2.45500600              | -0.23269000 |
| H 1.10579300  | -0.49707300              | 1.93719800  | H 2.13020700  | 2.23724600              | 0.22721400  |
| C -2.66745300 | -0.88962500              | 0.44466500  |               | SCF energy=-668.4533237 |             |
| H -3.35399500 | -0.94986800              | -0.41173100 | C -0.87999700 | 0.00794500              | -0.32697800 |
| H -2.91618900 | -1.72471000              | 1.11036500  | C -2.03168000 | -0.64746200             | -0.04937500 |
| H -2.86561900 | 0.04882800               | 0.95921400  | O 0.13826900  | -0.70867100             | -0.94518400 |
| C -0.80433400 | -2.46469400              | -0.24037500 | C 1.48699500  | -0.45422500             | -0.71297500 |

|                                                                                     |                         |             |             |                                                                                     |                         |             |             |
|-------------------------------------------------------------------------------------|-------------------------|-------------|-------------|-------------------------------------------------------------------------------------|-------------------------|-------------|-------------|
| H                                                                                   | 0.13028100              | -2.54322500 | -0.79694700 | O                                                                                   | 2.24961200              | -0.44285100 | -1.65271600 |
| H                                                                                   | -0.68051100             | -2.97094700 | 0.72799900  | C                                                                                   | -3.30786200             | -0.01557500 | 0.44575500  |
| H                                                                                   | -1.58711300             | -3.01427400 | -0.77902900 | H                                                                                   | -3.33111500             | 1.06819900  | 0.35270600  |
| C                                                                                   | -0.62665100             | 1.44723600  | -0.19375400 | H                                                                                   | -4.15716000             | -0.43918300 | -0.10578000 |
| O                                                                                   | 0.26082500              | 2.27680600  | -0.25172400 | H                                                                                   | -3.46581200             | -0.26514300 | 1.50485300  |
| O                                                                                   | -1.93150100             | 1.80695600  | -0.07878800 | C                                                                                   | -2.13175500             | -2.13453400 | -0.28424800 |
| H                                                                                   | -1.93993600             | 2.78270500  | -0.05108200 | H                                                                                   | -1.16115800             | -2.60729300 | -0.43989300 |
| 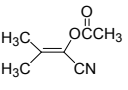   | SCF energy=-477.4125913 |             |             | H                                                                                   | -2.64097300             | -2.61598000 | 0.56118600  |
| C                                                                                   | -0.44663600             | 0.18838500  | -0.30085500 | H                                                                                   | -2.74567600             | -2.33240100 | -1.17456700 |
| C                                                                                   | -1.51056400             | -0.58156400 | 0.01435500  | N                                                                                   | 1.84750900              | -0.25899800 | 0.59904700  |
| O                                                                                   | 0.74552200              | -0.37738200 | -0.75129400 | C                                                                                   | 1.22754400              | -0.96615600 | 1.71807700  |
| C                                                                                   | 1.92546600              | -0.31380000 | -0.01998700 | H                                                                                   | 1.86025600              | -1.81034700 | 2.03099900  |
| O                                                                                   | 2.90063400              | -0.82338600 | -0.50566300 | H                                                                                   | 1.10828400              | -0.28817600 | 2.57133700  |
| C                                                                                   | 1.88375500              | 0.38105500  | 1.31965600  | H                                                                                   | 0.24868000              | -1.35262400 | 1.44296700  |
| H                                                                                   | 2.83660600              | 0.20879800  | 1.82158300  | C                                                                                   | 3.23358100              | 0.14465200  | 0.82460100  |
| H                                                                                   | 1.73719000              | 1.45905900  | 1.18894200  | H                                                                                   | 3.29731500              | 0.63773400  | 1.80015700  |
| H                                                                                   | 1.06268600              | 0.00873800  | 1.94089200  | H                                                                                   | 3.91470700              | -0.71869300 | 0.81472000  |
| C                                                                                   | -2.83996400             | 0.01758800  | 0.38334800  | H                                                                                   | 3.54198000              | 0.84071900  | 0.04442400  |
| H                                                                                   | -2.82563900             | 1.10988500  | 0.40764400  | C                                                                                   | -0.61391700             | 1.47160000  | -0.23446500 |
| H                                                                                   | -3.60788900             | -0.30027900 | -0.33464900 | O                                                                                   | 0.23768700              | 2.04838400  | -0.87915700 |
| H                                                                                   | -3.15888500             | -0.34716500 | 1.36874300  | O                                                                                   | -1.39580300             | 2.12713000  | 0.66611700  |
| C                                                                                   | -1.42801100             | -2.08235500 | -0.00515000 | H                                                                                   | -1.13746500             | 3.06677300  | 0.60872800  |
| H                                                                                   | -0.45390800             | -2.44484400 | -0.33714100 |  | SCF energy=-572.1045112 |             |             |
| H                                                                                   | -1.63705000             | -2.48683300 | 0.99486200  | C                                                                                   | 1.15983300              | 0.27986100  | -0.24707500 |
| H                                                                                   | -2.19760400             | -2.48997300 | -0.67414700 | C                                                                                   | 2.05361100              | -0.72017500 | -0.12661900 |
| C                                                                                   | -0.49334800             | 1.62176400  | -0.34380100 | O                                                                                   | -0.16388700             | 0.05816800  | -0.63339800 |
| N                                                                                   | -0.49556200             | 2.78604500  | -0.37235200 | C                                                                                   | -1.09401400             | -0.04918900 | 0.39714100  |
|  | SCF energy=-424.4830925 |             |             | O                                                                                   | -0.76434800             | -0.13732000 | 1.56580700  |
|                                                                                     |                         |             |             | C                                                                                   | 3.49379400              | -0.45426300 | 0.21582100  |



|   |             |             |             |
|---|-------------|-------------|-------------|
| H | 1.22994300  | 0.98448800  | 1.71045700  |
| H | 0.92389100  | -0.75236400 | 1.82276500  |
| C | -2.85165000 | 0.19623500  | 0.33732900  |
| H | -3.00596100 | 1.26178000  | 0.13234100  |
| H | -3.64538500 | -0.34867500 | -0.19088200 |
| H | -3.02561500 | 0.04186700  | 1.41286500  |
| C | -1.36024100 | -1.81377500 | -0.17780000 |
| H | -0.37237800 | -2.12539800 | -0.52424300 |
| H | -1.55057300 | -2.28988400 | 0.79625600  |
| H | -2.10344000 | -2.22528400 | -0.87538100 |
| N | -0.40198700 | 1.90818000  | -0.18040300 |
| H | 0.05377100  | 2.36608100  | -0.96649900 |
| H | -1.29439600 | 2.34645500  | 0.01678900  |

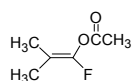

SCF energy=-484.4261548

|   |             |             |             |
|---|-------------|-------------|-------------|
| C | 0.43364500  | -0.30156800 | -0.38609400 |
| C | 1.57006600  | 0.26725500  | 0.01754800  |
| O | -0.71141000 | 0.35116700  | -0.73154500 |
| C | -1.89310700 | 0.19474500  | -0.00297800 |
| O | -2.87441500 | 0.74709700  | -0.42068200 |
| C | -1.82411300 | -0.64619300 | 1.24749800  |
| H | -2.75990000 | -0.52449700 | 1.79420900  |
| H | -1.69006300 | -1.70106800 | 0.98574600  |
| H | -0.97892000 | -0.35248800 | 1.87875100  |
| C | 2.82047800  | -0.54255800 | 0.24588400  |
| H | 2.67058900  | -1.60806700 | 0.05839700  |
| H | 3.62808900  | -0.18919300 | -0.40978500 |
| H | 3.17435000  | -0.42055400 | 1.27877000  |
| C | 1.65834300  | 1.75497200  | 0.24470600  |
| H | 0.72030100  | 2.26852600  | 0.02178400  |

|   |             |             |             |
|---|-------------|-------------|-------------|
| H | 0.63916200  | -2.27066900 | -0.67831900 |
| H | 2.34481300  | -2.65518700 | -1.00760000 |
| H | 1.73953900  | -2.69016700 | 0.65012800  |
| N | -2.36347300 | -0.06400500 | -0.08601000 |
| C | -2.72522800 | 0.10101300  | -1.48939000 |
| H | -3.23287900 | -0.80031200 | -1.85823400 |
| H | -3.41016000 | 0.95195800  | -1.59721800 |
| H | -1.83842200 | 0.28253700  | -2.09226500 |
| C | -3.46858100 | -0.22318200 | 0.85142800  |
| H | -4.10975800 | 0.66782200  | 0.83735900  |
| H | -4.07514300 | -1.09439200 | 0.57244600  |
| H | -3.07092300 | -0.36364100 | 1.85580700  |
| C | 1.48055700  | 1.66729200  | -0.07885600 |
| N | 1.71489000  | 2.80217500  | 0.03632400  |

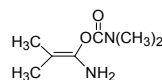

SCF energy=-535.2253416

|   |             |             |             |
|---|-------------|-------------|-------------|
| C | 1.22405500  | -0.37085400 | 0.30971100  |
| C | 2.24688400  | 0.38300300  | -0.13274100 |
| O | -0.04978000 | 0.21759400  | 0.39308500  |
| C | -1.11205100 | -0.44248900 | -0.16083300 |
| O | -1.00562300 | -1.50130300 | -0.76959100 |
| C | 3.65700600  | -0.15250500 | -0.20723700 |
| H | 3.70813700  | -1.24695700 | -0.23148000 |
| H | 4.14993000  | 0.20826700  | -1.11980800 |
| H | 4.27204600  | 0.19061800  | 0.63908400  |
| C | 2.08317800  | 1.83013300  | -0.52531700 |
| H | 1.05635500  | 2.18134800  | -0.40562500 |
| H | 2.73606900  | 2.47632900  | 0.08108300  |
| H | 2.37693600  | 1.98534900  | -1.57382800 |
| N | 1.26702800  | -1.64819300 | 0.88154100  |

|                                                                                     |                         |             |                                                                                   |                          |             |
|-------------------------------------------------------------------------------------|-------------------------|-------------|-----------------------------------------------------------------------------------|--------------------------|-------------|
| H 1.93568900                                                                        | 1.97162400              | 1.28568100  | H 0.61324500                                                                      | -2.28620800              | 0.43055500  |
| H 2.44305500                                                                        | 2.18966700              | -0.38925000 | H 2.19972100                                                                      | -2.04263000              | 0.89969500  |
| F 0.32794800                                                                        | -1.64222000             | -0.60954100 | N -2.28337400                                                                     | 0.21860600               | 0.05634400  |
| 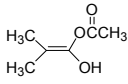   | SCF energy=-460.4068298 |             | C -2.39097400                                                                     | 1.49729700               | 0.74730200  |
| C 0.45711100                                                                        | -0.47521000             | -0.35053200 | H -2.61478300                                                                     | 2.30648100               | 0.03751200  |
| C 1.51462300                                                                        | 0.29440600              | -0.06887000 | H -3.20648900                                                                     | 1.44610600               | 1.47936500  |
| O -0.74340500                                                                       | 0.02467000              | -0.84213600 | H -1.46344900                                                                     | 1.72579900               | 1.26790900  |
| C -1.85643000                                                                       | 0.14865700              | -0.02017300 | C -3.50827800                                                                     | -0.30420500              | -0.53272200 |
| O -2.90490100                                                                       | 0.43623800              | -0.53725800 | H -4.26895000                                                                     | -0.44451100              | 0.24580800  |
| C -1.64453300                                                                       | -0.05880500             | 1.46073900  | H -3.90282900                                                                     | 0.39511500               | -1.28284200 |
| H -2.60651800                                                                       | 0.05159000              | 1.96266200  | H -3.29720700                                                                     | -1.26060400              | -1.00955700 |
| H -1.22758000                                                                       | -1.05007000             | 1.66409800  |  | SCF energy=-579.11451079 |             |
| H -0.93850500                                                                       | 0.68137700              | 1.85280200  | C -0.95437900                                                                     | -0.45644500              | -0.08655000 |
| C 2.83285000                                                                        | -0.31260800             | 0.33832700  | C -2.17057300                                                                     | 0.07081700               | 0.06353000  |
| H 2.81707500                                                                        | -1.40342700             | 0.28733200  | O 0.00426400                                                                      | -0.51692400              | 0.87642800  |
| H 3.64043900                                                                        | 0.05597900              | -0.30942300 | C 1.36741700                                                                      | -0.59303800              | 0.51198200  |
| H 3.09589700                                                                        | -0.02233800             | 1.36575300  | O 1.99462300                                                                      | -1.58979800              | 0.79212200  |
| C 1.44552700                                                                        | 1.79868600              | -0.12845000 | C -3.21255900                                                                     | -0.02874600              | -1.02135100 |
| H 0.47518300                                                                        | 2.16259400              | -0.47465600 | H -2.84370800                                                                     | -0.54725500              | -1.90943300 |
| H 1.65087700                                                                        | 2.24012000              | 0.85777800  | H -4.09879700                                                                     | -0.56678700              | -0.65634700 |
| H 2.21361000                                                                        | 2.18839300              | -0.81061200 | H -3.55217400                                                                     | 0.97136900               | -1.32545900 |
| O 0.45099100                                                                        | -1.84233500             | -0.22179500 | C -2.56688500                                                                     | 0.75883100               | 1.34530400  |
| H -0.03684600                                                                       | -2.22355300             | -0.97245900 | H -1.74958500                                                                     | 0.79530200               | 2.06991600  |
|  | SCF energy=-499.709033  |             | H -2.90332600                                                                     | 1.78644400               | 1.14673800  |
| C -0.44618200                                                                       | 0.22323900              | -0.10571200 | H -3.41020000                                                                     | 0.23640000               | 1.81848000  |
| C -1.50222400                                                                       | -0.60151100             | -0.08052500 | N 1.85918200                                                                      | 0.52740700               | -0.07820600 |
| O 0.74513200                                                                        | -0.11657100             | -0.74693000 | C 1.13650400                                                                      | 1.78475600               | -0.23556000 |
| C 1.88751800                                                                        | -0.40477400             | -0.02151600 | H 1.80732200                                                                      | 2.61066900               | 0.02820700  |
|                                                                                     |                         |             | H 0.80176200                                                                      | 1.92549700               | -1.27191900 |

|   |             |             |             |
|---|-------------|-------------|-------------|
| O | 2.92393400  | -0.52060700 | -0.62613900 |
| C | 1.73281300  | -0.58219700 | 1.47085600  |
| H | 2.70426800  | -0.85121600 | 1.88736500  |
| H | 1.36936900  | 0.33966300  | 1.93568200  |
| H | 1.00400400  | -1.36955000 | 1.69205800  |
| C | -2.81912500 | -0.17062300 | 0.51291500  |
| H | -2.79191300 | 0.86006800  | 0.87277500  |
| H | -3.62468400 | -0.26211700 | -0.22918800 |
| H | -3.09461700 | -0.82022900 | 1.35603500  |
| C | -1.43418800 | -2.00593800 | -0.62363100 |
| H | -0.46954900 | -2.23244700 | -1.08313900 |
| H | -1.62300400 | -2.74146500 | 0.17194200  |
| H | -2.21480200 | -2.15929600 | -1.38149100 |
| O | -0.43555500 | 1.46818500  | 0.45434500  |
| C | -0.19978000 | 2.55521100  | -0.46052800 |
| H | -0.21447800 | 3.46254800  | 0.14563100  |
| H | 0.77080500  | 2.45128700  | -0.95546500 |
| H | -0.99648500 | 2.59425400  | -1.21356200 |

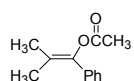

SCF energy=-616.2344375

|   |             |             |             |
|---|-------------|-------------|-------------|
| C | -0.64851900 | 0.43644700  | -0.28381000 |
| C | -1.31081700 | 1.60880200  | -0.20369900 |
| O | -1.37853800 | -0.70659800 | -0.67444900 |
| C | -1.63421700 | -1.74698500 | 0.18552400  |
| O | -2.13870900 | -2.74649900 | -0.26729400 |
| C | -1.29263200 | -1.55309500 | 1.64598100  |
| H | -1.72458400 | -2.37974700 | 2.21175300  |
| H | -0.20631000 | -1.54913500 | 1.78670600  |
| H | -1.67562300 | -0.59877400 | 2.02157400  |
| C | -0.62289600 | 2.93972100  | -0.01653300 |

|   |             |             |             |
|---|-------------|-------------|-------------|
| H | 0.27279700  | 1.81889900  | 0.42605600  |
| C | 3.23474200  | 0.51027000  | -0.56817400 |
| H | 3.25847700  | 0.85401700  | -1.60942100 |
| H | 3.86661900  | 1.17349300  | 0.03701000  |
| H | 3.62458700  | -0.50513900 | -0.50989400 |
| F | -0.56497200 | -1.07440700 | -1.23333100 |

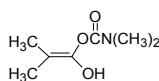

SCF energy=-555.1021846

|   |             |             |             |
|---|-------------|-------------|-------------|
| C | 1.22488700  | -0.36813800 | -0.25814700 |
| C | 2.28852200  | 0.35883700  | 0.10674300  |
| O | -0.04221900 | 0.24628900  | -0.34526000 |
| C | -1.12787800 | -0.44153600 | 0.11126900  |
| O | -1.05108200 | -1.57895200 | 0.58028600  |
| C | 3.66283300  | -0.26000600 | 0.13183700  |
| H | 3.63544200  | -1.32644400 | -0.10156600 |
| H | 4.32630300  | 0.23258700  | -0.59424500 |
| H | 4.12598700  | -0.13133900 | 1.12056500  |
| C | 2.19663000  | 1.81767600  | 0.47195500  |
| H | 1.17236800  | 2.19599300  | 0.44187400  |
| H | 2.59267800  | 1.98694600  | 1.48350000  |
| H | 2.80621100  | 2.42907800  | -0.20962300 |
| N | -2.28072200 | 0.26193400  | -0.02375100 |
| C | -2.36290500 | 1.61376000  | -0.56425900 |
| H | -3.08062500 | 1.63558300  | -1.39407700 |
| H | -2.70748400 | 2.31256400  | 0.20978700  |
| H | -1.39036000 | 1.93560400  | -0.92968500 |
| C | -3.53350400 | -0.33430800 | 0.42306200  |
| H | -3.98359700 | 0.28064900  | 1.21318900  |
| H | -4.23933600 | -0.39816400 | -0.41495200 |
| H | -3.33862800 | -1.33337600 | 0.81043200  |

|               |             |             |                                                                                                              |              |             |
|---------------|-------------|-------------|--------------------------------------------------------------------------------------------------------------|--------------|-------------|
| H 0.45488100  | 2.89522900  | -0.18584900 | O 1.27229600                                                                                                 | -1.64851000  | -0.70096400 |
| H -1.04695600 | 3.67278600  | -0.71574400 | H 0.52262800                                                                                                 | -2.12155800  | -0.27620800 |
| H -0.79378400 | 3.33946600  | 0.99356700  | 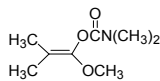<br>SCF energy=-594.4021785 |              |             |
| C -2.81021100 | 1.69218900  | -0.35022700 |                                                                                                              | C 0.94480700 | 0.20914100  |
| H -3.28318800 | 0.71467200  | -0.45538800 | C 2.05776100                                                                                                 | -0.53977400  | 0.05998600  |
| H -3.25068600 | 2.20653800  | 0.51599000  | O -0.07832000                                                                                                | -0.03436200  | 0.98274400  |
| H -3.07215600 | 2.29162800  | -1.23350300 | C -1.38933800                                                                                                | 0.28415700   | 0.61218200  |
| C 0.81194900  | 0.19509600  | -0.17346600 | O -1.92152100                                                                                                | 1.28554100   | 1.05381800  |
| C 1.44392100  | -0.66443300 | -1.09244400 | C 3.20936600                                                                                                 | -0.21780600  | -0.85847600 |
| C 1.58947800  | 0.77350600  | 0.84535800  | H 2.99783200                                                                                                 | 0.64197900   | -1.49830500 |
| C 2.81439900  | -0.91196600 | -1.00978000 | H 4.12351000                                                                                                 | -0.00834900  | -0.28411100 |
| H 0.85315800  | -1.13211600 | -1.87450700 | H 3.43761000                                                                                                 | -1.07607600  | -1.50703500 |
| C 2.96148900  | 0.52438800  | 0.92658900  | C 2.23343800                                                                                                 | -1.73006400  | 0.96822400  |
| H 1.11423200  | 1.40383300  | 1.59141900  | H 1.36512300                                                                                                 | -1.89935200  | 1.60923100  |
| C 3.58021600  | -0.31600300 | -0.00269000 | H 2.42281400                                                                                                 | -2.64369500  | 0.38523700  |
| H 3.28507400  | -1.57195700 | -1.73400600 | H 3.10737900                                                                                                 | -1.59078300  | 1.62058500  |
| H 3.54362200  | 0.97830500  | 1.72470800  | N -1.99205600                                                                                                | -0.64325800  | -0.17870100 |
| H 4.64731900  | -0.51195300 | 0.06240900  | C -1.35925700                                                                                                | -1.86110600  | -0.66941800 |
|               |             |             | H -2.07176200                                                                                                | -2.69012000  | -0.58325800 |
|               |             |             | H -1.06969000                                                                                                | -1.75960500  | -1.72426600 |
|               |             |             | H -0.47658300                                                                                                | -2.09753500  | -0.07949700 |
|               |             |             | C -3.34204400                                                                                                | -0.38319700  | -0.66665800 |
|               |             |             | H -3.34099600                                                                                                | -0.31214200  | -1.76252500 |
|               |             |             | H -4.01277400                                                                                                | -1.19916000  | -0.36934700 |
|               |             |             | H -3.70192000                                                                                                | 0.55318800   | -0.24267800 |
|               |             |             | O 0.71179100                                                                                                 | 1.24469400   | -0.78480600 |
|               |             |             | C 0.80768900                                                                                                 | 2.56300400   | -0.19738400 |
|               |             |             | H 0.59877600                                                                                                 | 3.26243900   | -1.00896600 |
|               |             |             | H 0.07204700                                                                                                 | 2.68454100   | 0.60167400  |

---

H 1.82289400 2.72436900 0.18465200

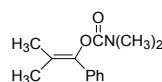

SCF energy=-710.9147988

C -0.25253200 1.01864200 -0.35532900

C -0.48920000 2.32619400 -0.12414800

O -1.27844700 0.27994400 -0.97389800

C -1.44852000 -1.07440000 -0.72666300

O -1.41318800 -1.86055500 -1.65504100

C 0.57949200 3.29205900 0.32767000

H 1.58305200 2.86212000 0.31446400

H 0.58165500 4.17518800 -0.32692600

H 0.37927800 3.66079400 1.34445400

C -1.83974900 2.95124400 -0.37513300

H -2.60773600 2.21390200 -0.61657600

H -2.16517900 3.52927000 0.50197700

H -1.78448900 3.66159200 -1.21273000

N -1.68208900 -1.42254100 0.57303800

C -2.14841300 -0.51143800 1.61116000

H -3.16607000 -0.79006300 1.91941500

H -1.49400900 -0.56674800 2.49036400

H -2.16421100 0.51331900 1.24849500

C -1.80905300 -2.84352700 0.88085200

H -1.42312400 -3.02326500 1.89024400

H -2.85856300 -3.16846100 0.83956800

H -1.23498600 -3.42510700 0.16007900

C 1.02620400 0.28836200 -0.15681200

C 1.57437900 -0.47146100 -1.20668500

C 1.70706700 0.32888500 1.07182800

C 2.78057300 -1.15188700 -1.03385300

H 1.04940900 -0.52890800 -2.15526600

---



|  |   |            |             |             |
|--|---|------------|-------------|-------------|
|  | C | 2.91527200 | -0.35050100 | 1.24202700  |
|  | H | 1.28089100 | 0.88953400  | 1.89955700  |
|  | C | 3.45715100 | -1.09198500 | 0.18839600  |
|  | H | 3.19204800 | -1.73045000 | -1.85700900 |
|  | H | 3.42777000 | -0.30722500 | 2.19994000  |
|  | H | 4.39594500 | -1.62393800 | 0.32034900  |

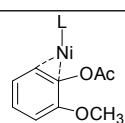

|    |             |             |             |
|----|-------------|-------------|-------------|
| C  | 0.81694000  | -0.00066400 | -1.83617400 |
| C  | 1.34864500  | -0.13248100 | -0.53678300 |
| C  | 0.15706800  | 1.19126200  | -2.21656500 |
| C  | 1.20612000  | 0.91228800  | 0.41572700  |
| C  | -0.00130400 | 2.22778700  | -1.27367800 |
| C  | 0.50893500  | 2.08821400  | 0.04225700  |
| Ni | -0.85581800 | 0.38569600  | -0.40141700 |
| P  | -2.65337700 | -0.55850300 | 0.21635100  |
| H  | 0.93658700  | -0.82505500 | -2.53172100 |
| H  | -0.24006800 | 1.29488100  | -3.22084900 |
| O  | 1.95825400  | -1.32816600 | -0.17748400 |
| C  | 3.32773300  | -1.45198700 | -0.07712500 |
| O  | 3.77077100  | -2.50739400 | 0.30302100  |
| C  | 4.17061700  | -0.25998300 | -0.47165000 |
| H  | 3.88320000  | 0.12882600  | -1.45392600 |
| H  | 4.04338700  | 0.54664300  | 0.25791100  |
| H  | 5.21601400  | -0.57178200 | -0.48659200 |
| C  | -2.79270100 | -1.11457600 | 1.98823600  |
| H  | -1.97763500 | -1.80897500 | 2.21844200  |

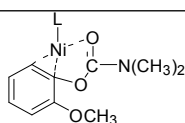

|    |             |             |             |
|----|-------------|-------------|-------------|
| C  | -0.10931200 | -1.28862600 | -1.87007200 |
| C  | -0.87231000 | -1.10946500 | -0.70359700 |
| C  | 1.05910900  | -2.08499600 | -1.84124400 |
| C  | -0.48070000 | -1.70293600 | 0.52142700  |
| C  | 1.47791700  | -2.65728100 | -0.61952400 |
| C  | 0.72199800  | -2.44844400 | 0.56535700  |
| Ni | 1.40415300  | -0.53832300 | -0.33411800 |
| P  | 2.35926000  | 1.30486600  | 0.11575800  |
| H  | -0.45264100 | -0.82911400 | -2.79130400 |
| H  | 1.63021300  | -2.24377600 | -2.74986200 |
| O  | -2.10144100 | -0.46945700 | -0.80646600 |
| C  | -2.29166500 | 0.75046500  | -0.18637900 |
| O  | -1.38991900 | 1.42208400  | 0.28230100  |
| C  | 1.96024700  | 2.09561600  | 1.75295100  |
| H  | 0.87532500  | 2.22467400  | 1.82219800  |
| H  | 2.28059100  | 1.43624600  | 2.56744100  |
| H  | 2.45188400  | 3.07064700  | 1.87137300  |
| C  | 4.21999300  | 1.38886700  | 0.15331200  |
| H  | 4.60350700  | 0.68777500  | 0.90273800  |



---

|    |             |             |             |    |             |             |             |
|----|-------------|-------------|-------------|----|-------------|-------------|-------------|
| C  | -0.53530700 | 1.92525300  | -0.23162100 | C  | 1.18775400  | 2.07279100  | -0.42599500 |
| Ni | 0.65601500  | 0.04599400  | 0.32932400  | Ni | 1.09956700  | -0.01684800 | 0.51279400  |
| P  | 2.44647200  | -0.99532800 | -0.13643700 | P  | 1.59970500  | -2.01611900 | 0.02263200  |
| H  | -1.44928700 | -1.02412400 | 2.19910800  | H  | -0.80654200 | 0.83939500  | 2.71335900  |
| H  | -0.18551900 | 0.98318800  | 3.04425800  | H  | 1.58817600  | 1.57901200  | 2.94085700  |
| O  | -2.18176500 | -1.39780700 | -0.32273900 | O  | -2.19971300 | 0.87008800  | 0.54864500  |
| C  | -3.55560500 | -1.47725200 | -0.39103500 | C  | -2.72313100 | 0.03299300  | -0.41197700 |
| O  | -4.04145100 | -2.48936500 | -0.83244300 | O  | -2.05736500 | -0.53874700 | -1.25813100 |
| C  | -4.35346600 | -0.28631600 | 0.09459600  | C  | 1.08973800  | -2.58723400 | -1.67270300 |
| H  | -4.11504700 | -0.04866600 | 1.13655300  | H  | 0.01846300  | -2.40162600 | -1.80106400 |
| H  | -4.12652100 | 0.60519600  | -0.49963700 | H  | 1.62144400  | -1.99908900 | -2.42894100 |
| H  | -5.41344400 | -0.52668000 | 0.00360800  | H  | 1.30259000  | -3.65253600 | -1.83429900 |
| C  | 2.62463700  | -1.66132000 | -1.86555800 | C  | 3.38243600  | -2.56013900 | 0.03472300  |
| H  | 1.79376900  | -2.34163400 | -2.08087000 | H  | 3.95752500  | -1.94046000 | -0.66198900 |
| H  | 2.57589400  | -0.83561800 | -2.58365800 | H  | 3.80386100  | -2.41880300 | 1.03606100  |
| H  | 3.57178300  | -2.19938500 | -2.00384800 | H  | 3.49457000  | -3.61430500 | -0.25298000 |
| C  | 4.07813400  | -0.11363100 | 0.03998200  | C  | 0.85105300  | -3.37086600 | 1.06033800  |
| H  | 4.09341900  | 0.76440800  | -0.61485000 | H  | 1.14215300  | -4.36986500 | 0.70855000  |
| H  | 4.19736700  | 0.23413700  | 1.07189400  | H  | 1.16792700  | -3.25347600 | 2.10241200  |
| H  | 4.92629500  | -0.76213200 | -0.21710600 | H  | -0.24059400 | -3.28744700 | 1.02820600  |
| C  | 2.80703400  | -2.53739400 | 0.84215000  | H  | 2.85168000  | 2.38019000  | 0.95501000  |
| H  | 3.74156100  | -3.01811100 | 0.52378500  | H  | -0.61812500 | 1.64356900  | -1.53856500 |
| H  | 2.87997300  | -2.28799200 | 1.90627000  | O  | 1.76372500  | 2.54325100  | -1.57210500 |
| H  | 1.98211700  | -3.24714600 | 0.71896300  | C  | 3.15841900  | 2.81980300  | -1.56141600 |
| H  | 0.36845000  | 2.85948400  | 1.51987500  | H  | 3.41495300  | 3.08756600  | -2.58808100 |
| H  | -1.47206200 | 0.71387000  | -1.77201700 | H  | 3.39555100  | 3.66202000  | -0.89813500 |
| O  | -0.32595300 | 2.91433900  | -1.14678300 | H  | 3.73113500  | 1.93444400  | -1.25585200 |
| C  | 0.48317300  | 4.02417100  | -0.77302400 | N  | -4.08056900 | -0.05564600 | -0.28323400 |
| H  | 0.57260300  | 4.63946500  | -1.66984400 | C  | -4.84660500 | 0.54951600  | 0.80002500  |
| H  | 0.01058400  | 4.61172900  | 0.02461600  | H  | -5.77922400 | 0.95808500  | 0.39307000  |

---



|                                                                                   |             |             |             |                                                                                     |             |             |             |
|-----------------------------------------------------------------------------------|-------------|-------------|-------------|-------------------------------------------------------------------------------------|-------------|-------------|-------------|
| H                                                                                 | 4.89885300  | 1.14306400  | -0.00971400 | C                                                                                   | 0.69405300  | -3.31102200 | 1.41140200  |
| O                                                                                 | 4.09491900  | -1.48556900 | 0.00180900  | H                                                                                   | 0.99943500  | -4.36092400 | 1.30720700  |
| C                                                                                 | 5.50344300  | -1.33746100 | -0.00599200 | H                                                                                   | 0.98633100  | -2.95268600 | 2.40451100  |
| H                                                                                 | 5.91245800  | -2.35045200 | -0.00462800 | H                                                                                   | -0.39718300 | -3.24917000 | 1.33876700  |
| H                                                                                 | 5.84876100  | -0.80794200 | -0.90522200 | H                                                                                   | -0.80911000 | 1.11608900  | -2.00802900 |
| H                                                                                 | 5.85815700  | -0.80178900 | 0.88589900  | H                                                                                   | 1.63010900  | 1.67821000  | -2.20188800 |
| 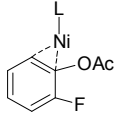 |             |             |             | O                                                                                   | 3.27422000  | 2.16823900  | -0.17699400 |
| C                                                                                 | 0.98401600  | 0.77187900  | -1.47838400 | C                                                                                   | 3.53340300  | 3.56286200  | -0.35076000 |
| C                                                                                 | 1.43486300  | 0.11774000  | -0.30831500 | H                                                                                   | 3.17213200  | 4.14232400  | 0.51016900  |
| C                                                                                 | 0.32123000  | 2.01811200  | -1.38039400 | H                                                                                   | 4.61821100  | 3.66559700  | -0.43119000 |
| C                                                                                 | 1.16535900  | 0.70082600  | 0.94895000  | H                                                                                   | 3.05973200  | 3.94391300  | -1.26579600 |
| C                                                                                 | 0.07784600  | 2.59641800  | -0.11444600 | N                                                                                   | -4.23738100 | 0.20911400  | 0.05466400  |
| C                                                                                 | 0.49892400  | 1.93513000  | 1.06443200  | C                                                                                   | -4.74321800 | 0.99306600  | 1.17398000  |
| Ni                                                                                | -0.75220400 | 0.51394800  | -0.10624500 | H                                                                                   | -5.49826400 | 1.71094700  | 0.82436200  |
| P                                                                                 | -2.56665300 | -0.59970200 | 0.01422700  | H                                                                                   | -5.21598700 | 0.32968700  | 1.91065100  |
| H                                                                                 | 1.17263600  | 0.30755100  | -2.44089500 | H                                                                                   | -3.93392600 | 1.53761300  | 1.65452400  |
| H                                                                                 | -0.01358100 | 2.52029400  | -2.28203000 | C                                                                                   | -5.21717400 | -0.60442700 | -0.65161800 |
| O                                                                                 | 2.06390400  | -1.11324300 | -0.40453100 | H                                                                                   | -5.67582500 | -1.32710000 | 0.03630300  |
| C                                                                                 | 3.43273300  | -1.25253500 | -0.25291200 | H                                                                                   | -6.01129700 | 0.03070400  | -1.06748100 |
| O                                                                                 | 3.89188000  | -2.36314200 | -0.33040600 | H                                                                                   | -4.72275300 | -1.14053200 | -1.46081500 |
| C                                                                                 | 4.24287500  | 0.00106900  | -0.01154700 |  |             |             |             |
| H                                                                                 | 4.00872800  | 0.78107700  | -0.74311000 | C                                                                                   | -0.82934400 | 2.08044000  | 0.75593800  |
| H                                                                                 | 4.03217800  | 0.40374200  | 0.98517700  | C                                                                                   | -0.79122700 | 1.12080800  | -0.30505900 |
| H                                                                                 | 5.29992700  | -0.26117800 | -0.07376700 | C                                                                                   | -0.00374600 | 3.17406300  | 0.81220700  |
| C                                                                                 | -2.68129600 | -1.89344700 | 1.34541300  | C                                                                                   | 0.19044700  | 1.33946100  | -1.34137000 |
| H                                                                                 | -1.87363400 | -2.62174500 | 1.21683300  | C                                                                                   | 0.90600700  | 3.41251800  | -0.25465900 |
| H                                                                                 | -2.55620800 | -1.42416900 | 2.32704700  | C                                                                                   | 0.99072200  | 2.52294500  | -1.30707200 |
| H                                                                                 | -3.64444700 | -2.41974400 | 1.32104700  |                                                                                     |             |             |             |

|   |             |             |             |    |             |             |             |
|---|-------------|-------------|-------------|----|-------------|-------------|-------------|
| C | -4.15337800 | 0.32575400  | 0.31201700  | Ni | 0.56872600  | -0.20600300 | -0.01568100 |
| H | -4.08440700 | 0.87726700  | 1.25588400  | P  | 2.57488600  | -1.07549400 | 0.08635600  |
| H | -4.31103700 | 1.05327800  | -0.49151200 | C  | 2.81193500  | -2.74825500 | 0.86672800  |
| H | -5.01903400 | -0.34811600 | 0.35682600  | H  | 2.43528900  | -2.72768900 | 1.89520900  |
| C | -3.04902800 | -1.61387800 | -1.46920500 | H  | 2.23145800  | -3.49531800 | 0.31446500  |
| H | -3.98733100 | -2.15954700 | -1.30449900 | H  | 3.86616600  | -3.05404300 | 0.87984700  |
| H | -3.16633900 | -0.96001100 | -2.34015200 | C  | 3.47468000  | -1.31901100 | -1.52082600 |
| H | -2.25450100 | -2.33361900 | -1.69337500 | H  | 2.91489000  | -2.01372400 | -2.15631000 |
| H | 0.33350800  | 2.35995300  | 2.04872800  | H  | 3.54340300  | -0.36104000 | -2.04666800 |
| H | -0.44105400 | 3.54633300  | -0.03862700 | H  | 4.48637100  | -1.71519900 | -1.36591400 |
| F | 1.64166300  | 0.09470100  | 2.06708100  | C  | 3.81977600  | -0.07487100 | 1.03530700  |
|   |             |             |             | H  | 4.81521400  | -0.53722400 | 1.01853000  |
|   |             |             |             | H  | 3.88285200  | 0.93017500  | 0.60560900  |
|   |             |             |             | H  | 3.49305600  | 0.02618900  | 2.07584500  |
|   |             |             |             | H  | 0.07195400  | 0.81345900  | -2.28758200 |
|   |             |             |             | H  | 1.65958400  | 2.72529900  | -2.14092200 |
|   |             |             |             | O  | -2.04911500 | 0.47304200  | -0.59420200 |
|   |             |             |             | C  | -2.14671000 | -0.77895600 | -0.09438100 |
|   |             |             |             | O  | -1.16990200 | -1.37513800 | 0.39169800  |
|   |             |             |             | N  | -3.38431600 | -1.31766100 | -0.20175200 |
|   |             |             |             | C  | -4.54524100 | -0.58566600 | -0.69667700 |
|   |             |             |             | H  | -5.01680200 | -1.14784300 | -1.51275300 |
|   |             |             |             | H  | -5.28204100 | -0.45636400 | 0.10753000  |
|   |             |             |             | H  | -4.24442400 | 0.39338300  | -1.06337400 |
|   |             |             |             | C  | -3.63021500 | -2.66313600 | 0.30129200  |
|   |             |             |             | H  | -2.68651300 | -3.11170400 | 0.60875900  |
|   |             |             |             | H  | -4.31227200 | -2.63012300 | 1.16154900  |
|   |             |             |             | H  | -4.08902500 | -3.27622600 | -0.48457500 |
|   |             |             |             | H  | 1.52822000  | 4.30288100  | -0.23156700 |
|   |             |             |             | H  | -0.07177500 | 3.84743900  | 1.66138900  |

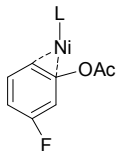









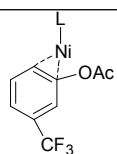

|    |             |             |             |             |             |             |             |
|----|-------------|-------------|-------------|-------------|-------------|-------------|-------------|
|    |             |             | Ni          | -0.30855100 | 0.40041600  | 0.07476700  |             |
|    |             |             | P           | -2.00306600 | 1.77845500  | 0.00799300  |             |
|    |             |             | C           | -1.80098500 | 3.48660300  | 0.71904300  |             |
|    |             |             | H           | -1.51484100 | 3.41158700  | 1.77385500  |             |
| C  | -1.18601800 | 0.53197300  | 1.22699600  | H           | -0.99538900 | 4.00886500  | 0.19161500  |
| C  | -1.56471100 | -0.04921200 | -0.00230100 | H           | -2.72194700 | 4.07895800  | 0.64150300  |
| C  | -0.48610700 | 1.76603000  | 1.23148900  | C           | -2.69540900 | 2.19367000  | -1.66661900 |
| C  | -1.18539000 | 0.53410500  | -1.23063400 | H           | -1.92054800 | 2.66807600  | -2.27855800 |
| C  | -0.17505000 | 2.36584900  | 0.00016500  | H           | -3.00911900 | 1.27447200  | -2.17246500 |
| C  | -0.48550000 | 1.76805100  | -1.23252900 | H           | -3.55584500 | 2.87148800  | -1.59515500 |
| Ni | 0.64103000  | 0.26951800  | -0.00244600 | C           | -3.54192200 | 1.22366500  | 0.89044900  |
| P  | 2.45944800  | -0.84215700 | 0.00035300  | H           | -4.35536500 | 1.95429200  | 0.79271000  |
| H  | -1.45136600 | 0.04221800  | 2.15803600  | H           | -3.87147100 | 0.26314600  | 0.48115000  |
| H  | -0.20790400 | 2.25507300  | 2.15843700  | H           | -3.32368200 | 1.07691900  | 1.95372400  |
| O  | -2.23230300 | -1.27330400 | -0.00371200 | H           | 0.05485700  | -0.85205600 | -2.11579500 |
| C  | -3.61001100 | -1.34662200 | -0.00010400 | H           | -2.02267600 | -2.25592000 | -1.98111900 |
| O  | -4.11546300 | -2.44118800 | -0.00192100 | O           | 2.07718500  | -0.97476400 | -0.28893400 |
| C  | -4.38304200 | -0.04551500 | 0.00637600  | C           | 2.47297500  | 0.26371200  | 0.07438200  |
| H  | -4.14121500 | 0.55262600  | 0.89135200  | O           | 1.67483900  | 1.12289400  | 0.48482200  |
| H  | -4.13992800 | 0.56323200  | -0.87090100 | N           | 3.80587000  | 0.47521700  | -0.06110600 |
| H  | -5.44763000 | -0.28256800 | 0.00453200  | C           | 4.74438400  | -0.53634400 | -0.53353200 |
| C  | 2.86919400  | -1.82356900 | -1.52638300 | H           | 5.23875500  | -0.19144200 | -1.45143600 |
| H  | 2.07054000  | -2.54698500 | -1.72233900 | H           | 5.51535400  | -0.71601600 | 0.22737900  |
| H  | 2.93425600  | -1.15199000 | -2.38921300 | H           | 4.22122100  | -1.46795400 | -0.73861400 |
| H  | 3.81980400  | -2.36287000 | -1.42261000 | C           | 4.36760400  | 1.77718700  | 0.27423800  |
| C  | 4.05594200  | 0.08295500  | 0.23749300  | H           | 3.56724500  | 2.44361800  | 0.59307000  |
| H  | 4.17103900  | 0.82641500  | -0.55852400 | H           | 5.10135300  | 1.67625800  | 1.08483500  |
| H  | 4.03156100  | 0.61713800  | 1.19332200  | H           | 4.87302300  | 2.20629900  | -0.60086400 |
| H  | 4.92472300  | -0.58827200 | 0.22669100  | H           | 1.10882600  | -2.09278400 | 1.90797100  |
| C  | 2.64398500  | -2.16330200 | 1.29712000  | H           | -0.94152200 | -3.52009800 | 1.97563700  |

|                                                                                   |             |             |             |                                                                                   |             |             |             |
|-----------------------------------------------------------------------------------|-------------|-------------|-------------|-----------------------------------------------------------------------------------|-------------|-------------|-------------|
| H                                                                                 | 3.60356500  | -2.68985200 | 1.21191700  | F                                                                                 | -2.64097000 | -3.78520700 | 0.03164900  |
| H                                                                                 | 2.57363000  | -1.71309600 | 2.29318000  |                                                                                   |             |             |             |
| H                                                                                 | 1.82958400  | -2.88888200 | 1.19817200  |                                                                                   |             |             |             |
| H                                                                                 | -1.45049500 | 0.04613100  | -2.16266200 | 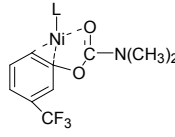 |             |             |             |
| H                                                                                 | -0.20700600 | 2.25891000  | -2.15842800 |                                                                                   |             |             |             |
| F                                                                                 | 0.45207400  | 3.57112100  | 0.00124200  | C                                                                                 | -1.14523800 | 1.32268600  | -0.07407400 |
|                                                                                   |             |             |             | C                                                                                 | 0.00637700  | 0.97030000  | 0.69167400  |
|  |             |             |             | C                                                                                 | -2.38334000 | 0.79554200  | 0.24655100  |
| C                                                                                 | -1.16567100 | -0.89512700 | 1.58556900  | C                                                                                 | -0.13440800 | 0.03528500  | 1.78051600  |
| C                                                                                 | -1.52964800 | -0.69653700 | 0.23702500  | C                                                                                 | -2.54783800 | -0.06052700 | 1.37108600  |
| C                                                                                 | -0.50271300 | 0.14234100  | 2.28316300  | C                                                                                 | -1.44559100 | -0.41719700 | 2.11947400  |
| C                                                                                 | -1.18216700 | 0.48409900  | -0.44688300 | Ni                                                                                | 0.71056700  | -0.70758400 | 0.05705700  |
| C                                                                                 | -0.18199800 | 1.35105400  | 1.63245400  | P                                                                                 | 0.85870200  | -2.87912500 | -0.21605200 |
| C                                                                                 | -0.48946400 | 1.50777800  | 0.25609100  | C                                                                                 | 2.03596700  | -3.56323100 | -1.48293900 |
| Ni                                                                                | 0.69178800  | -0.29264800 | 0.42583100  | H                                                                                 | 1.78300700  | -3.16321600 | -2.47089100 |
| P                                                                                 | 2.55433500  | -1.13146100 | -0.21035400 | H                                                                                 | 3.05653900  | -3.24422700 | -1.24512600 |
| H                                                                                 | -1.41131200 | -1.83272500 | 2.07326800  | H                                                                                 | 2.00519100  | -4.65960500 | -1.52499100 |
| H                                                                                 | -0.23394800 | 0.00365800  | 3.32537100  | C                                                                                 | 1.34308600  | -3.87543700 | 1.27551300  |
| O                                                                                 | -2.16253200 | -1.72414300 | -0.45527800 | H                                                                                 | 2.33730000  | -3.56887100 | 1.61802800  |
| C                                                                                 | -3.54036600 | -1.80514400 | -0.54043100 | H                                                                                 | 0.63250200  | -3.68555600 | 2.08678900  |
| O                                                                                 | -4.01063700 | -2.73132300 | -1.15045200 | H                                                                                 | 1.35785100  | -4.95131000 | 1.05913200  |
| C                                                                                 | -4.34814800 | -0.72096600 | 0.13812400  | C                                                                                 | -0.71667200 | -3.72752900 | -0.71145600 |
| H                                                                                 | -4.10962000 | -0.65571400 | 1.20486500  | H                                                                                 | -0.58814400 | -4.81492100 | -0.78582800 |
| H                                                                                 | -4.13562000 | 0.25953900  | -0.30157400 | H                                                                                 | -1.49748000 | -3.50730600 | 0.02368300  |
| H                                                                                 | -5.40580800 | -0.95475600 | 0.01091200  | H                                                                                 | -1.05266600 | -3.34227600 | -1.68000400 |
| C                                                                                 | 2.81317100  | -1.30107300 | -2.04301900 | H                                                                                 | 0.65949500  | -0.04862200 | 2.52061800  |
| H                                                                                 | 2.03293900  | -1.94332200 | -2.46513300 | H                                                                                 | -1.57138300 | -1.04298100 | 3.00055300  |
| H                                                                                 | 2.73184500  | -0.31723700 | -2.51722300 | O                                                                                 | 1.06004700  | 1.96266700  | 0.71537700  |
| H                                                                                 | 3.79540200  | -1.73078200 | -2.27869100 | C                                                                                 | 2.09712300  | 1.69586600  | -0.10935900 |
| C                                                                                 | 4.10447200  | -0.22457800 | 0.26938600  | O                                                                                 | 2.18639900  | 0.62488500  | -0.73490200 |
|                                                                                   |             |             |             | N                                                                                 | 3.01470200  | 2.68983300  | -0.17746100 |



|   |             |             |             |   |             |             |             |
|---|-------------|-------------|-------------|---|-------------|-------------|-------------|
| H | 4.04920900  | 1.34846100  | -0.88363700 | H | -0.00118800 | -3.39455600 | -2.36578800 |
| H | 4.04872200  | 1.35113600  | 0.87895400  | H | 1.60868200  | -2.81511000 | -1.90463500 |
| H | 5.56003100  | 0.98836100  | -0.00134500 | H | 1.10914200  | -4.47500400 | -1.48125300 |
| C | -2.54820100 | -2.57254700 | 1.62258900  | C | 1.46927400  | -3.16084600 | 1.17778400  |
| H | -1.76463900 | -2.82301700 | 2.34568900  | H | 1.78168900  | -4.21054500 | 1.10659100  |
| H | -3.11212100 | -1.72108200 | 2.01810400  | H | 2.32539800  | -2.51647000 | 0.95316100  |
| H | -3.22386900 | -3.43141500 | 1.51905900  | H | 1.15423600  | -2.95301900 | 2.20591000  |
| C | -3.28393900 | -1.98443500 | -1.07483600 | H | -0.25675900 | 0.59940900  | -2.17430900 |
| H | -3.88223800 | -1.11860200 | -0.77216100 | H | .22018600   | 0.56565700  | -2.05069000 |
| H | -2.98209300 | -1.83614900 | -2.11708900 | O | -1.85993500 | 1.76603200  | -0.29787000 |
| H | -3.90355800 | -2.88806000 | -1.00798300 | C | -2.86079300 | 0.93665400  | 0.06583500  |
| C | -1.10077400 | -3.75181800 | -0.54142400 | O | -2.64883500 | -0.23154200 | 0.43809200  |
| H | -1.86360100 | -4.53983800 | -0.49444500 | N | -4.09409300 | 1.49007000  | -0.01909200 |
| H | -0.73001800 | -3.67765400 | -1.56930000 | C | -4.33934700 | 2.85871600  | -0.46166200 |
| H | -0.25721700 | -4.03280600 | 0.09787300  | H | -4.91978600 | 2.85737300  | -1.39395700 |
| H | 1.69591400  | -0.00210500 | 2.16083600  | H | -4.91361300 | 3.39756200  | 0.30272300  |
| H | -0.21247700 | 1.62666400  | 2.16898200  | H | -3.39643300 | 3.37481900  | -0.62998000 |
| C | -1.41697700 | 2.78402500  | 0.00051300  | C | -5.26891900 | 0.69079600  | 0.30621600  |
| F | -0.89265600 | 4.04456300  | -0.00122000 | H | -4.95339500 | -0.30389600 | 0.61809600  |
| F | -2.21724500 | 2.70423000  | -1.09034700 | H | -5.83286700 | 1.16590900  | 1.11906300  |
| F | -2.21461700 | 2.70623500  | 1.09361300  | H | -5.92411800 | 0.60755100  | -0.57079500 |
|   |             |             |             | H | -0.41006800 | 2.09474500  | 1.90170600  |
|   |             |             |             | H | 2.05979100  | 2.12399900  | 1.96543400  |
|   |             |             |             | C | 3.78770900  | 1.40478400  | 0.01515700  |
|   |             |             |             | F | 4.24358100  | 2.61817100  | 0.43998900  |
|   |             |             |             | F | 4.30804100  | 0.49449700  | 0.89838200  |
|   |             |             |             | F | 4.38769200  | 1.15767600  | -1.17744100 |
| C | -0.99733800 | 0.09705500  | -1.69165800 |   |             |             |             |
| C | -1.40876200 | 0.08658700  | -0.34674900 |   |             |             |             |
| C | -0.28671200 | -1.01382700 | -2.20870700 |   |             |             |             |
| C | -1.12363500 | -1.01837400 | 0.50823200  |   |             |             |             |

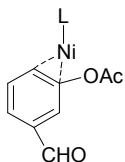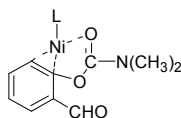

---

|    |             |             |             |    |             |             |             |
|----|-------------|-------------|-------------|----|-------------|-------------|-------------|
| C  | -0.05784300 | -2.15529800 | -1.40045100 | C  | 0.18323100  | 1.55193400  | 0.76525600  |
| C  | -0.44411800 | -2.14149500 | -0.05107100 | C  | -0.85139500 | 1.28486000  | -0.21922400 |
| Ni | 0.79263700  | -0.31600800 | -0.41369800 | C  | 1.04530000  | 2.67758800  | 0.55083000  |
| P  | 2.64880300  | 0.57870000  | 0.17831700  | C  | -0.93648800 | 2.12402800  | -1.37664200 |
| H  | -0.23446000 | -2.98155100 | 0.60287400  | C  | 0.94076200  | 3.45514000  | -0.57796000 |
| H  | 0.46637700  | -3.01352600 | -1.80847000 | C  | -0.04050100 | 3.15325400  | -1.56643200 |
| H  | -1.20283700 | 0.96769300  | -2.30619400 | Ni | 0.42461100  | -0.15430600 | -0.40492900 |
| H  | 0.04513400  | -1.00216900 | -3.24212000 | P  | 2.32337400  | -1.27909500 | -0.22713100 |
| O  | -2.05117700 | 1.20819000  | 0.17034600  | C  | 2.28427600  | -2.76537200 | 0.88323700  |
| C  | -3.41844800 | 1.39159400  | 0.05273400  | H  | 1.98579300  | -2.45470400 | 1.89003100  |
| O  | -3.88454400 | 2.41155700  | 0.49145100  | H  | 1.54433700  | -3.48351100 | 0.51410000  |
| C  | -4.21686500 | 0.29070700  | -0.60868500 | H  | 3.26404800  | -3.25633500 | 0.93877900  |
| H  | -3.91108200 | 0.15664700  | -1.65165800 | C  | 3.07290000  | -1.99096800 | -1.76958600 |
| H  | -4.06647400 | -0.66798500 | -0.10102200 | H  | 2.37113700  | -2.69357200 | -2.23176700 |
| H  | -5.27162100 | 0.56544700  | -0.57077500 | H  | 3.26955100  | -1.18812900 | -2.48824000 |
| C  | 2.94814000  | 0.78025300  | 2.00109100  | H  | 4.01341500  | -2.51468300 | -1.55752700 |
| H  | 2.16528200  | 1.41276800  | 2.43275700  | C  | 3.74695600  | -0.33208100 | 0.48282100  |
| H  | 2.89833800  | -0.19715700 | 2.49238400  | H  | 4.63298500  | -0.96615700 | 0.61302700  |
| H  | 3.92630200  | 1.23425800  | 2.20552400  | H  | 3.99826700  | 0.50139600  | -0.18181200 |
| C  | 4.21548100  | -0.28245400 | -0.33139200 | H  | 3.45239700  | 0.08465200  | 1.45184800  |
| H  | 4.22371100  | -1.29871800 | 0.07663900  | H  | -1.73025700 | 1.93391400  | -2.09502200 |
| H  | 4.25645500  | -0.35751600 | -1.42332400 | H  | -0.10590000 | 3.76243700  | -2.46467200 |
| H  | 5.10777900  | 0.25011200  | 0.02235200  | O  | -2.11985800 | 0.70112800  | 0.19207700  |
| C  | 2.99854600  | 2.30491800  | -0.41582600 | C  | -2.29514300 | -0.58240200 | -0.18550600 |
| H  | 3.96718100  | 2.67291100  | -0.05361900 | O  | -1.38219900 | -1.25086100 | -0.70489700 |
| H  | 2.99762500  | 2.32555800  | -1.51093000 | N  | -3.53681400 | -1.06355200 | 0.05900000  |
| H  | 2.20891800  | 2.97831200  | -0.06609500 | C  | -4.59772800 | -0.28324000 | 0.68834600  |
| C  | -1.47029100 | -1.00778900 | 1.94400900  | H  | -5.50304200 | -0.32981500 | 0.07043900  |
| O  | -1.32199600 | -1.97140000 | 2.68371900  | H  | -4.83314600 | -0.69125800 | 1.68047900  |
| H  | -1.86971800 | -0.05537600 | 2.33718500  |    |             |             |             |

---

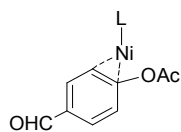

|    |             |             |             |
|----|-------------|-------------|-------------|
| C  | -1.18913700 | -0.17702900 | 1.49806900  |
| C  | -1.57031500 | -0.20703200 | 0.13731800  |
| C  | -0.51022500 | 0.96106500  | 2.00801400  |
| C  | -1.18118000 | 0.82056800  | -0.73867300 |
| C  | -0.15883900 | 2.01823400  | 1.15267100  |
| C  | -0.47259800 | 1.94787600  | -0.23282000 |
| Ni | 0.64869500  | 0.09213400  | 0.29573500  |
| P  | 2.46796400  | -0.96100300 | -0.12617300 |
| H  | 0.38124000  | 2.88403000  | 1.52051800  |
| H  | -1.45538300 | -1.00663800 | 2.14516800  |
| H  | -0.24487400 | 0.99874300  | 3.05987400  |
| O  | -2.23676000 | -1.32301100 | -0.36186900 |
| C  | -3.61680000 | -1.39309900 | -0.38980000 |
| O  | -4.11893500 | -2.39547300 | -0.83098300 |
| C  | -4.38835500 | -0.20245100 | 0.13528300  |
| H  | -4.13790900 | 0.00089400  | 1.18184000  |
| H  | -4.15265900 | 0.70230300  | -0.43521700 |
| H  | -5.45322900 | -0.42175500 | 0.04918100  |
| C  | 2.80957400  | -1.40715800 | -1.89804400 |
| H  | 1.99253400  | -2.02617600 | -2.28361100 |
| H  | 2.85766900  | -0.49621200 | -2.50416600 |
| H  | 3.75399700  | -1.95616600 | -2.00597500 |
| C  | 4.07242100  | -0.14468200 | 0.33526300  |
| H  | 4.16251100  | 0.81157500  | -0.19082400 |
| H  | 4.08358500  | 0.06230900  | 1.41068600  |
| H  | 4.93705100  | -0.77282000 | 0.08452600  |

|   |             |             |             |
|---|-------------|-------------|-------------|
| H | -4.28968100 | 0.75488800  | 0.79398900  |
| C | -3.84381200 | -2.45709100 | -0.24032900 |
| H | -2.97163200 | -2.93003800 | -0.68941700 |
| H | -4.11486900 | -2.99096200 | 0.67999900  |
| H | -4.68898400 | -2.51335800 | -0.93791000 |
| H | 1.59801600  | 4.30943100  | -0.71717200 |
| H | 1.76793400  | 2.90384200  | 1.33045500  |
| C | 0.24811400  | 0.80042600  | 2.02594700  |
| O | 1.15445300  | 0.89733500  | 2.85601400  |
| H | -0.60040600 | 0.11655400  | 2.22226700  |

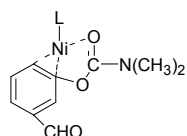

|    |             |             |             |
|----|-------------|-------------|-------------|
| C  | 0.20812300  | -2.07992000 | 0.40592800  |
| C  | 0.63861500  | -1.06343000 | -0.48486500 |
| C  | -1.00994700 | -2.72946900 | 0.21478500  |
| C  | -0.22841500 | -0.66865300 | -1.56893300 |
| C  | -1.81818000 | -2.41959900 | -0.91934100 |
| C  | -1.42581200 | -1.42682300 | -1.78756200 |
| Ni | -0.23293000 | 0.60504400  | 0.02260600  |
| P  | -1.86323700 | 2.06256000  | 0.13658700  |
| C  | -1.69773400 | 3.56023200  | 1.22685900  |
| H  | -1.51686200 | 3.24412200  | 2.25994800  |
| H  | -0.83742400 | 4.15644700  | 0.90393200  |
| H  | -2.59759900 | 4.18797600  | 1.19996400  |
| C  | -2.37450600 | 2.85795900  | -1.46194300 |
| H  | -1.53295000 | 3.42001500  | -1.88094800 |
| H  | -2.65651600 | 2.08341500  | -2.18266400 |
| H  | -3.22307000 | 3.53948300  | -1.32196600 |





|    |             |             |             |    |             |             |             |
|----|-------------|-------------|-------------|----|-------------|-------------|-------------|
| H  | -1.30927400 | -3.36980800 | 0.73115400  | C  | 2.07895200  | 2.29343800  | 0.15718900  |
| H  | -1.92997300 | -2.46064400 | 2.11722100  | C  | 1.61139800  | 1.71054600  | -1.02896400 |
| H  | -3.06236700 | -3.35943300 | 1.07097900  | Ni | 0.01830000  | -0.52983300 | 0.05209900  |
| C  | -3.88468800 | -0.52200600 | 0.67349800  | P  | 1.39321800  | -2.25797800 | 0.01794000  |
| H  | -3.72565000 | -0.14322400 | 1.68863600  | C  | 0.75117900  | -3.92347100 | 0.53655300  |
| H  | -4.19109300 | 0.32210800  | 0.04659100  | H  | 0.37245200  | -3.86654000 | 1.56280500  |
| H  | -4.69308400 | -1.26439900 | 0.69224500  | H  | -0.08333600 | -4.21184800 | -0.11167900 |
| C  | -2.90169700 | -2.00171100 | -1.56553600 | H  | 1.52724900  | -4.69783900 | 0.48588800  |
| H  | -3.77111400 | -2.65140300 | -1.40202700 | C  | 2.16777300  | -2.67486300 | -1.61680100 |
| H  | -3.17805900 | -1.21112400 | -2.27134800 | H  | 1.38641300  | -2.91690800 | -2.34523500 |
| H  | -2.09775600 | -2.59179600 | -2.01820200 | H  | 2.72047800  | -1.80622600 | -1.98920000 |
| H  | 1.49539600  | 0.16747700  | 2.12174900  | H  | 2.85401700  | -3.52724000 | -1.53492700 |
| H  | 0.04590600  | 2.23039300  | 1.96216400  | C  | 2.89636700  | -2.10522300 | 1.09602500  |
| C  | -0.85377400 | 3.42416200  | -0.30508400 | H  | 3.54676900  | -2.98491900 | 1.01106700  |
| O  | -1.23540100 | 4.09700900  | 0.64077200  | H  | 3.46207300  | -1.21287400 | 0.80908600  |
| H  | -1.15462500 | 3.69098000  | -1.34102000 | H  | 2.59001900  | -1.98883700 | 2.14102800  |
|    |             |             |             | H  | -0.10454300 | 0.95300300  | -2.11113000 |
|    |             |             |             | H  | 2.27728000  | 1.67700400  | -1.88784500 |
|    |             |             |             | O  | -2.00281800 | 1.36767900  | -0.20941900 |
|    |             |             |             | C  | -2.65902100 | 0.21120100  | 0.01826300  |
|    |             |             |             | O  | -2.06016100 | -0.83903500 | 0.31544000  |
|    |             |             |             | N  | -4.00303500 | 0.30201200  | -0.11640800 |
|    |             |             |             | C  | -4.70277000 | 1.54323000  | -0.43202400 |
|    |             |             |             | H  | -5.33937100 | 1.39431800  | -1.31324400 |
|    |             |             |             | H  | -5.34079800 | 1.84351200  | 0.40987800  |
|    |             |             |             | H  | -3.98766200 | 2.33677200  | -0.63853000 |
|    |             |             |             | C  | -4.83379400 | -0.87231300 | 0.12087500  |
|    |             |             |             | H  | -4.19543900 | -1.72997400 | 0.32853700  |
|    |             |             |             | H  | -5.49990300 | -0.69951000 | 0.97646900  |
|    |             |             |             | H  | -5.44882100 | -1.08009800 | -0.76375000 |
| C  | 1.05250400  | 0.67744000  | -1.39719800 |    |             |             |             |
| C  | 1.44029600  | 0.11416900  | -0.16155500 |    |             |             |             |
| C  | 0.38593200  | 1.92409300  | -1.41535700 |    |             |             |             |
| C  | 1.13907600  | 0.73401800  | 1.07812900  |    |             |             |             |
| C  | 0.09816200  | 2.57976000  | -0.19854300 |    |             |             |             |
| C  | 0.45648000  | 1.97937900  | 1.03007000  |    |             |             |             |
| Ni | -0.75539400 | 0.50685200  | -0.10594400 |    |             |             |             |
| P  | -2.57709500 | -0.58283200 | -0.03628800 |    |             |             |             |
| H  | 0.21511900  | 2.48047500  | 1.96321100  |    |             |             |             |

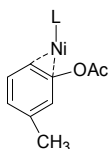

|                                                                                     |             |             |             |                                                                                   |             |             |             |  |
|-------------------------------------------------------------------------------------|-------------|-------------|-------------|-----------------------------------------------------------------------------------|-------------|-------------|-------------|--|
| H                                                                                   | -0.42130000 | 3.53283700  | -0.20243800 | H                                                                                 | -0.76026700 | 1.97672100  | 2.06233800  |  |
| H                                                                                   | 1.27925900  | 0.14762500  | -2.31701500 | H                                                                                 | 1.57298500  | 2.80152100  | 2.20770000  |  |
| H                                                                                   | 0.09294600  | 2.36737900  | -2.36175700 | C                                                                                 | 3.43850700  | 2.82055500  | 0.25083300  |  |
| C                                                                                   | 1.56777300  | 0.12124600  | 2.38868600  | O                                                                                 | 4.28657900  | 2.78715300  | -0.63641600 |  |
| H                                                                                   | 2.62863600  | 0.32080600  | 2.59849900  | H                                                                                 | 3.69007300  | 3.28235800  | 1.23202300  |  |
| H                                                                                   | 0.98480300  | 0.53983500  | 3.21501300  |                                                                                   |             |             |             |  |
| H                                                                                   | 1.43479100  | -0.96428700 | 2.38450100  | 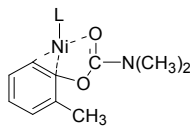 |             |             |             |  |
| O                                                                                   | 2.08245000  | -1.12790400 | -0.16013900 | C                                                                                 | -0.77069400 | 2.12084900  | 0.76653700  |  |
| C                                                                                   | 3.44831200  | -1.23550100 | -0.29126900 | C                                                                                 | -0.78404700 | 1.15839300  | -0.30234600 |  |
| O                                                                                   | 3.93382700  | -2.34014500 | -0.27719200 | C                                                                                 | 0.14781700  | 3.15846400  | 0.70493600  |  |
| C                                                                                   | 4.24252500  | 0.04380000  | -0.44920100 | C                                                                                 | 0.14604300  | 1.27962200  | -1.39246500 |  |
| H                                                                                   | 3.97999900  | 0.55212500  | -1.38324300 | C                                                                                 | 1.01939300  | 3.32907900  | -0.40108200 |  |
| H                                                                                   | 4.03818900  | 0.74479200  | 0.36660600  | C                                                                                 | 1.01225600  | 2.41095100  | -1.43339600 |  |
| H                                                                                   | 5.30263600  | -0.21271600 | -0.46095100 | Ni                                                                                | 0.56371900  | -0.20418500 | 0.00220000  |  |
| C                                                                                   | -2.96755000 | -1.53178100 | 1.51806300  | P                                                                                 | 2.55344400  | -1.08523300 | 0.09881300  |  |
| H                                                                                   | -2.17010100 | -2.25636400 | 1.71507900  | H                                                                                 | 0.17693700  | 3.87839300  | 1.52084600  |  |
| H                                                                                   | -3.01332200 | -0.84227600 | 2.36804000  | C                                                                                 | 2.79748000  | -2.75757900 | 0.88295600  |  |
| H                                                                                   | -3.92318900 | -2.06725700 | 1.44251800  | H                                                                                 | 2.43199500  | -2.73294300 | 1.91549400  |  |
| C                                                                                   | -4.17718200 | 0.34446300  | -0.25543400 | H                                                                                 | 2.20943300  | -3.50545900 | 0.33967200  |  |
| H                                                                                   | -4.27077100 | 1.10445400  | 0.52790600  | H                                                                                 | 3.85118800  | -3.06620000 | 0.88605700  |  |
| H                                                                                   | -4.17277400 | 0.85854700  | -1.22264300 | C                                                                                 | 3.44379800  | -1.34172500 | -1.51304100 |  |
| H                                                                                   | -5.04883000 | -0.32197500 | -0.21060100 | H                                                                                 | 2.87609200  | -2.03557700 | -2.14250000 |  |
| C                                                                                   | -2.80846500 | -1.93082800 | -1.29971400 | H                                                                                 | 3.51402400  | -0.38594000 | -2.04265600 |  |
| H                                                                                   | -3.76917800 | -2.44887100 | -1.17942000 | H                                                                                 | 4.45437900  | -1.74314300 | -1.36295800 |  |
| H                                                                                   | -2.76046000 | -1.50167400 | -2.30642900 | C                                                                                 | 3.81706700  | -0.09091900 | 1.03266300  |  |
| H                                                                                   | -1.99639700 | -2.65997700 | -1.20752400 | H                                                                                 | 4.80976000  | -0.55905400 | 1.00454400  |  |
|                                                                                     |             |             |             | H                                                                                 | 3.88045900  | 0.91328100  | 0.60101200  |  |
|  |             |             |             | H                                                                                 | 3.50350500  | 0.01327400  | 2.07700900  |  |
|                                                                                     |             |             |             | H                                                                                 | -0.03247400 | 0.71502500  | -2.30634600 |  |



|    |             |             |             |   |             |             |             |
|----|-------------|-------------|-------------|---|-------------|-------------|-------------|
| H  | -5.04883000 | -0.32197500 | -0.21060100 | C | 2.58942300  | -2.79412500 | -1.15645600 |
| C  | -2.80846500 | -1.93082800 | -1.29971400 | H | 1.78758500  | -3.53519000 | -1.06885000 |
| H  | -3.76917800 | -2.44887100 | -1.17942000 | H | 2.54825400  | -2.37254100 | -2.16661700 |
| H  | -2.76046000 | -1.50167400 | -2.30642900 | H | 3.55607500  | -3.29662400 | -1.02074800 |
| H  | -1.99639700 | -2.65997700 | -1.20752400 | C | 3.91464700  | -0.49555800 | -0.09251400 |
|    |             |             |             | H | 3.92390300  | 0.01244000  | -1.06245600 |
|    |             |             |             | H | 3.97626500  | 0.27291400  | 0.68545400  |
|    |             |             |             | H | 4.79413200  | -1.14877500 | -0.01995600 |
|    |             |             |             | C | 2.67488300  | -2.36944400 | 1.67010200  |
| C  | 1.05250400  | 0.67744000  | -1.39719800 | H | 3.63156500  | -2.90649900 | 1.62931700  |
| C  | 1.44029600  | 0.11416900  | -0.16155500 | H | 2.69893700  | -1.66720700 | 2.51064300  |
| C  | 0.38593200  | 1.92409300  | -1.41535700 | H | 1.86969200  | -3.08795500 | 1.85767300  |
| C  | 1.13907600  | 0.73401800  | 1.07812900  | H | -0.16722000 | 0.52218000  | -2.38232600 |
| C  | 0.09816200  | 2.57976000  | -0.19854300 | H | 1.64853000  | 2.22234900  | -2.52291600 |
| C  | 0.45648000  | 1.97937900  | 1.03007000  | O | -2.13110700 | 0.57921200  | -0.49338000 |
| Ni | -0.75539400 | 0.50685200  | -0.10594400 | C | -2.31352800 | -0.62778900 | 0.07726100  |
| P  | -2.57709500 | -0.58283200 | -0.03628800 | O | -1.37806700 | -1.27871000 | 0.57302800  |
| H  | 0.21511900  | 2.48047500  | 1.96321100  | N | -3.59991400 | -1.06107400 | 0.04712300  |
| H  | -0.42130000 | 3.53283700  | -0.20243800 | C | -4.70101100 | -0.29099600 | -0.51899000 |
| H  | 1.27925900  | 0.14762500  | -2.31701500 | H | -5.17031000 | -0.85123900 | -1.33881400 |
| H  | 0.09294600  | 2.36737900  | -2.36175700 | H | -5.46204700 | -0.10283300 | 0.25020200  |
| C  | 1.56777300  | 0.12124600  | 2.38868600  | H | -4.33641200 | 0.66054900  | -0.90035000 |
| H  | 2.62863600  | 0.32080600  | 2.59849900  | C | -3.93722500 | -2.36153800 | 0.60962000  |
| H  | 0.98480300  | 0.53983500  | 3.21501300  | H | -3.03266000 | -2.83530200 | 0.98872600  |
| H  | 1.43479100  | -0.96428700 | 2.38450100  | H | -4.65770200 | -2.24470200 | 1.43015900  |
| O  | 2.08245000  | -1.12790400 | -0.16013900 | H | -4.38838000 | -3.00089300 | -0.16073100 |
| C  | 3.44831200  | -1.23550100 | -0.29126900 | H | 1.89955400  | 3.93002200  | -0.75863200 |
| O  | 3.93382700  | -2.34014500 | -0.27719200 | H | -1.29864700 | 2.11676700  | 1.48925200  |
| C  | 4.24252500  | 0.04380000  | -0.44920100 | C | 0.53716700  | 4.14619500  | 1.60138900  |
| H  | 3.97999900  | 0.55212500  | -1.38324300 | H | 1.52029900  | 4.05602600  | 2.08382800  |
| H  | 4.03818900  | 0.74479200  | 0.36660600  |   |             |             |             |

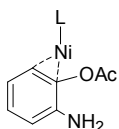





|   |             |             |             |   |             |             |             |
|---|-------------|-------------|-------------|---|-------------|-------------|-------------|
| P | -2.49605300 | -0.70982900 | 0.08416000  | O | 3.02137300  | -2.24743900 | 0.28860800  |
| H | 1.41095900  | -0.57831000 | -2.24287800 | C | -2.96643400 | -2.42509400 | 0.19437700  |
| H | 0.21263600  | 1.55864500  | -2.83668400 | H | -2.18641600 | -2.90583400 | -0.40568600 |
| O | 2.10998000  | -1.27678200 | 0.22464500  | H | -2.70147400 | -2.55116000 | 1.24987500  |
| C | 3.47938300  | -1.42116300 | 0.24431100  | H | -3.92420800 | -2.92811600 | 0.00563000  |
| O | 3.92989300  | -2.49082800 | 0.57447400  | C | -4.55792600 | -0.12824800 | 0.74998800  |
| C | 4.31853400  | -0.22554100 | -0.15190900 | H | -4.33617800 | -0.16547400 | 1.82212600  |
| H | 4.09608900  | 0.08741100  | -1.17743700 | H | -4.83819800 | 0.90128000  | 0.50207200  |
| H | 4.11439900  | 0.63241600  | 0.49720200  | H | -5.40878600 | -0.78992700 | 0.53895400  |
| H | 5.36960400  | -0.50591200 | -0.07280900 | C | -3.76941800 | -0.70208100 | -1.92742100 |
| C | -2.77971900 | -1.45229600 | 1.76882100  | H | -4.67586700 | -1.32171300 | -1.95770200 |
| H | -1.96496700 | -2.14609700 | 2.00205500  | H | -4.01693700 | 0.30710200  | -2.27423600 |
| H | -2.77352700 | -0.66037000 | 2.52586100  | H | -3.02937500 | -1.12136700 | -2.61766000 |
| H | -3.73493100 | -1.99085800 | 1.82606100  | H | -1.08011100 | 3.32127200  | 1.16486000  |
| C | -4.10433200 | 0.20536800  | -0.13631700 | H | -0.24465300 | 1.56263300  | 2.71275900  |
| H | -4.13880400 | 1.05755200  | 0.55128400  | N | 1.28072700  | -0.53220600 | 2.07461200  |
| H | -4.16617700 | 0.59636500  | -1.15770700 | H | 0.78932400  | -0.58300200 | 2.95942500  |
| H | -4.97434900 | -0.43791100 | 0.05175900  | H | 1.47224500  | -1.45758400 | 1.69923300  |
| C | -2.82855500 | -2.20221800 | -0.97871600 | N | 3.95258900  | -0.28746500 | -0.43708100 |
| H | -3.78605000 | -2.67874700 | -0.72990500 | C | 5.24607100  | -0.59199600 | 0.16757800  |
| H | -2.84125900 | -1.90634300 | -2.03325000 | H | 5.96511600  | -0.91912700 | -0.59562700 |
| H | -2.02217700 | -2.93089000 | -0.84383700 | H | 5.63766800  | 0.30632400  | 0.65928800  |
| H | -0.28831400 | 3.25076600  | -1.08305800 | H | 5.12236800  | -1.38659700 | 0.90233900  |
| H | 1.47797500  | 0.64406300  | 1.90459700  | C | 3.90192200  | 0.89663500  | -1.28759300 |
| N | 0.37556700  | 3.07480200  | 1.51385300  | H | 3.82269300  | 1.81574700  | -0.69306100 |
| H | -0.37411200 | 3.72492600  | 1.30487300  | H | 4.82287300  | 0.94129000  | -1.88101000 |
| H | 0.28487700  | 2.71742000  | 2.45859000  | H | 3.05536000  | 0.84025800  | -1.96883200 |

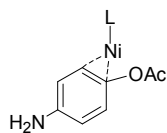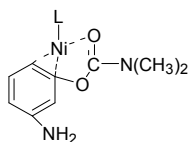

---

|    |             |             |             |    |             |             |             |
|----|-------------|-------------|-------------|----|-------------|-------------|-------------|
| C  | 1.17760900  | 0.53391700  | -1.21860600 | C  | -0.21203900 | 1.45876200  | 1.62519700  |
| C  | 1.55987100  | -0.05289000 | 0.00328300  | C  | -0.87018300 | 1.20061100  | 0.40483000  |
| C  | 0.49096000  | 1.77383600  | -1.21874800 | C  | 1.03770000  | 2.11578500  | 1.59092100  |
| C  | 1.17927100  | 0.53922300  | 1.22371800  | C  | -0.33607600 | 1.62904700  | -0.82810800 |
| C  | 0.18384700  | 2.43185900  | -0.00095200 | C  | 1.59570400  | 2.54893500  | 0.36546100  |
| C  | 0.49324800  | 1.77920600  | 1.21961500  | C  | 0.90103200  | 2.32075300  | -0.84948600 |
| Ni | -0.65885900 | 0.28864800  | 0.00614800  | Ni | 1.20938200  | 0.34738800  | 0.31169800  |
| P  | -2.43468100 | -0.86926100 | 0.00013000  | P  | 2.10208600  | -1.55046600 | 0.05878100  |
| H  | 1.42865000  | 0.04317900  | -2.15342600 | H  | -0.66193400 | 1.14031900  | 2.55864600  |
| H  | 0.23030700  | 2.23998500  | -2.16477500 | H  | 1.56723900  | 2.31022400  | 2.51825000  |
| O  | 2.21665100  | -1.28627600 | 0.00577000  | O  | -2.14357200 | 0.64577300  | 0.52844200  |
| C  | 3.59044600  | -1.36783200 | -0.00018300 | C  | -2.63618300 | -0.27267900 | -0.36742000 |
| O  | 4.09256100  | -2.46538400 | 0.00367400  | O  | -2.03431700 | -0.66560300 | -1.35346200 |
| C  | 4.37292300  | -0.07172000 | -0.01178300 | C  | 1.70877200  | -2.46615200 | -1.51512600 |
| H  | 4.13314700  | 0.52549900  | -0.89785400 | H  | 0.62210500  | -2.55086600 | -1.62040500 |
| H  | 4.13394700  | 0.54188400  | 0.86316900  | H  | 2.08205600  | -1.89411100 | -2.37189000 |
| H  | 5.43591200  | -0.31622300 | -0.01038100 | H  | 2.15667800  | -3.46887800 | -1.53579900 |
| C  | -3.01984900 | -1.57742000 | 1.62062700  | C  | 3.96149400  | -1.69306300 | 0.05501600  |
| H  | -2.23086100 | -2.20421400 | 2.04999800  | H  | 4.37380400  | -1.06884400 | -0.74534900 |
| H  | -3.22357600 | -0.76445400 | 2.32599800  | H  | 4.35978600  | -1.32382300 | 1.00646300  |
| H  | -3.92897000 | -2.18180800 | 1.50181200  | H  | 4.29722900  | -2.72851300 | -0.09287800 |
| C  | -4.02022700 | -0.09602900 | -0.60003600 | C  | 1.69613800  | -2.87776300 | 1.30424900  |
| H  | -4.26248700 | 0.77396900  | 0.02021800  | H  | 2.19845300  | -3.82716600 | 1.07404600  |
| H  | -3.89062300 | 0.25131400  | -1.63083100 | H  | 1.99946800  | -2.54829100 | 2.30396600  |
| H  | -4.86111700 | -0.80155900 | -0.56636500 | H  | 0.61346200  | -3.04331000 | 1.31896300  |
| C  | -2.42022400 | -2.41591000 | -1.03692100 | H  | 2.54382900  | 3.07855500  | 0.35572700  |
| H  | -3.36847600 | -2.96589200 | -0.97131000 | H  | -0.86900000 | 1.42847300  | -1.74881500 |
| H  | -2.23351900 | -2.15309600 | -2.08380700 | N  | 1.38854500  | 2.83809300  | -2.05855400 |
| H  | -1.60563600 | -3.06897400 | -0.70619600 | H  | 2.39475900  | 2.96369000  | -2.07723900 |
| H  | 1.43239600  | 0.05278800  | 2.16020400  | H  | 1.08016400  | 2.32829000  | -2.87945300 |

---



|   |             |            |             |   |             |             |             |
|---|-------------|------------|-------------|---|-------------|-------------|-------------|
| H | 0.23487400  | 2.24988600 | 2.16399100  | N | -3.88263900 | -0.68912100 | 0.00867500  |
| N | -0.37638600 | 3.71640200 | -0.00332800 | C | -4.63208500 | -0.14552800 | 1.13472700  |
| H | -0.91159700 | 3.93588500 | -0.83637400 | H | -5.41794100 | 0.54175100  | 0.78862200  |
| H | -0.91036500 | 3.93961600 | 0.82949600  | H | -5.11033100 | -0.96843300 | 1.67978500  |
|   |             |            |             | H | -3.96879700 | 0.38922400  | 1.81094400  |
|   |             |            |             | C | -4.61057800 | -1.59183200 | -0.87266600 |
|   |             |            |             | H | -5.00899800 | -2.43404200 | -0.29361800 |
|   |             |            |             | H | -5.45150200 | -1.07269200 | -1.35492100 |
|   |             |            |             | H | -3.93491700 | -1.96685300 | -1.64055400 |

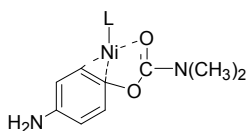

|    |             |             |             |
|----|-------------|-------------|-------------|
| C  | -0.47269300 | 1.06135500  | 1.21883700  |
| C  | -1.00593600 | 0.61101800  | -0.00135600 |
| C  | 0.56743700  | 2.02122500  | 1.21759100  |
| C  | -0.47124800 | 1.06114400  | -1.22122500 |
| C  | 1.06983500  | 2.54281700  | -0.00039900 |
| C  | 0.56910400  | 2.02056100  | -1.21901800 |
| Ni | 1.20057600  | 0.23674900  | -0.00033300 |
| P  | 2.60390000  | -1.33983800 | 0.00047200  |
| H  | -0.87809600 | 0.69041400  | 2.15402900  |
| H  | 0.95406400  | 2.39130800  | 2.16301700  |
| O  | -2.01781200 | -0.35456700 | -0.00195700 |
| C  | -3.31720000 | 0.11026300  | -0.00002000 |
| O  | -3.60356300 | 1.29554700  | 0.00372300  |
| C  | 2.73185800  | -2.39953600 | -1.52871200 |
| H  | 1.75840000  | -2.85545500 | -1.73945500 |
| H  | 3.00017600  | -1.77294900 | -2.38636700 |
| H  | 3.48141000  | -3.19520500 | -1.42064600 |
| C  | 4.40890000  | -0.93810400 | 0.24592600  |

|   |             |             |             |
|---|-------------|-------------|-------------|
| H | 4.74299800  | -0.25791100 | -0.54531300 |
| H | 4.54255100  | -0.42783100 | 1.20610900  |
| H | 5.03926700  | -1.83745800 | 0.23061100  |
| C | 2.40903000  | -2.67536200 | 1.28712500  |
| H | 3.17746600  | -3.45503300 | 1.19657700  |
| H | 2.47021400  | -2.23124800 | 2.28667800  |
| H | 1.42072400  | -3.13698600 | 1.18642700  |
| H | -0.87537900 | 0.68986700  | -2.15683800 |
| H | 0.95738100  | 2.38973700  | -2.16410600 |
| N | 2.00708500  | 3.58637500  | 0.00019100  |
| H | 2.58517600  | 3.62482000  | 0.83253000  |
| H | 2.58385600  | 3.62722600  | -0.83294300 |
| N | -4.21004600 | -0.92193800 | -0.00360300 |
| C | -3.84801100 | -2.33316000 | -0.00261900 |
| H | -4.25014500 | -2.82624300 | 0.89326700  |
| H | -4.27019200 | -2.83096000 | -0.88639600 |
| H | -2.76616800 | -2.44631100 | -0.01449700 |
| C | -5.63405000 | -0.61903000 | 0.00307000  |
| H | -6.11909500 | -1.04946000 | -0.88346400 |
| H | -6.11016600 | -1.04181500 | 0.89826100  |
| H | -5.76950600 | 0.46204000  | -0.00067900 |

Figures . Correlations between the experimental and theoretical C-O BDEs calculated by other DFT methods.

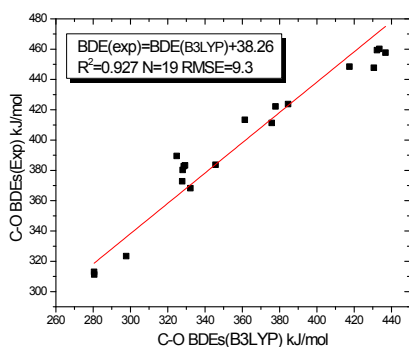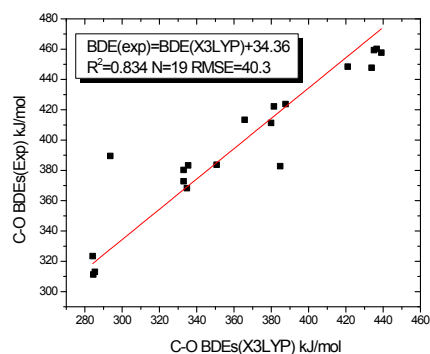

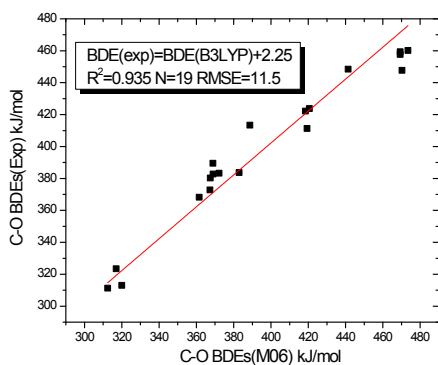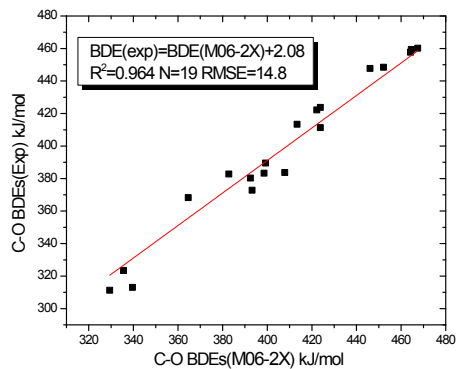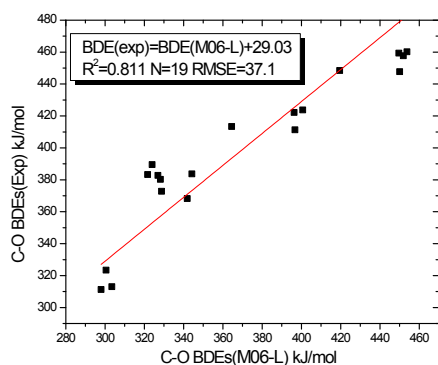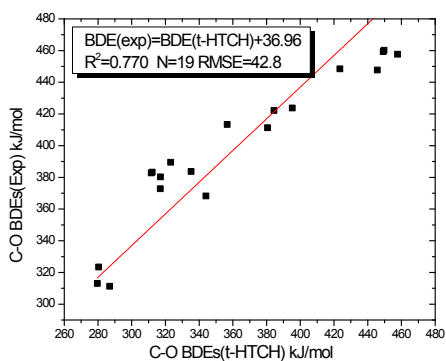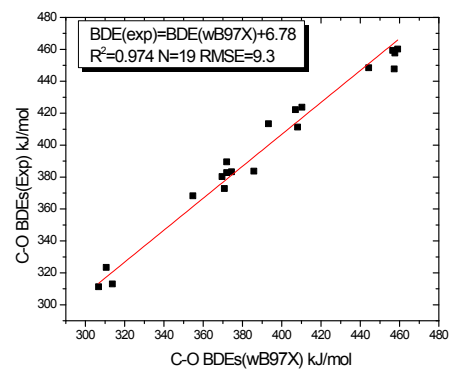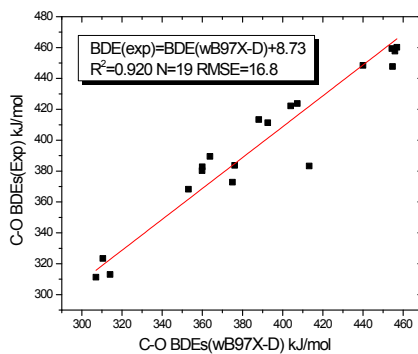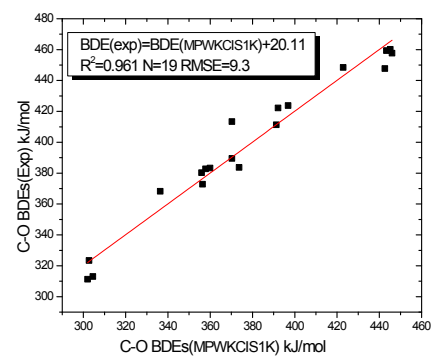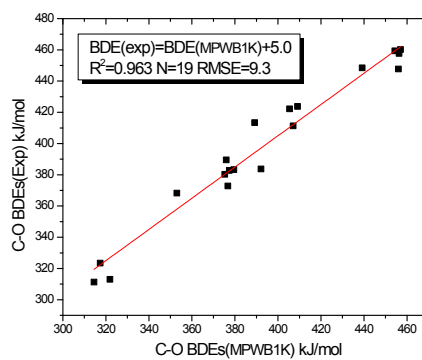

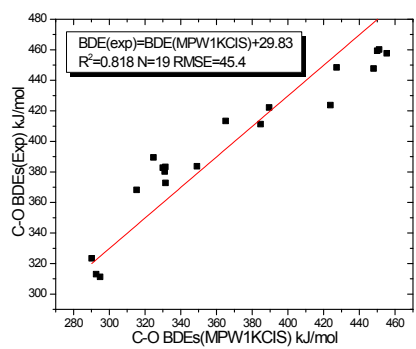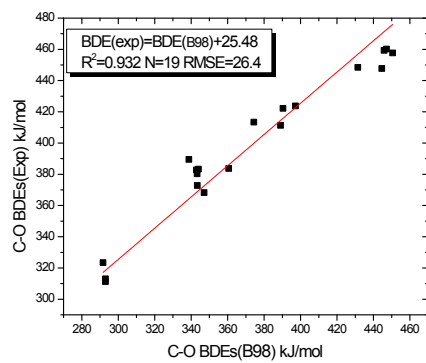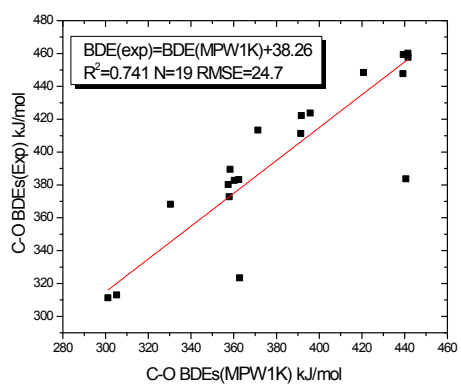

Supplement: c5ra27859g1.pdf [file c5ra27859g1.pdf]
